# Limits to adaptation in partially selfing species

Matthew Hartfield<sup>1,2,3,\*</sup> and Sylvain Glémin<sup>4,5</sup>

<sup>1</sup> Laboratoire MIVEGEC (UMR CNRS 5290, IRD 224, UM1, UM2), 911 avenue Agropolis, B.P. 64501, 34394 Montpellier cedex 5, France.

<sup>2</sup> Department of Ecology and Evolutionary Biology, University of Toronto, Ontario, Canada.

<sup>3</sup> Bioinformatics Research Centre, University of Aarhus, 8000C Aarhus, Denmark.

<sup>4</sup> Institut des Sciences de l'Evolution de Montpellier, UMR 5554 CNRS, Place Eugène Bataillon, 34095 Montpellier cedex 5, France.

<sup>5</sup> Department of Ecology and Genetics, Evolutionary Biology Centre, Uppsala University, SE-752 36 Uppsala, Sweden.

\* *Corresponding author:* [matthew.hartfield@utoronto.ca](mailto:matthew.hartfield@utoronto.ca)

*Running Head:* Adaptation limits in partial selfers

*Key words:* Adaptation, selection interference, dominance, self-fertilisation, recombination.

*Website for simulation code:*

<http://github.com/MattHartfield/TwoAdvSelfSims>

## Abstract

2           In outcrossing populations, “Haldane’s Sieve” states that recessive be-  
neficial alleles are less likely to fix than dominant ones, because they are  
4           less expose to selection when rare. In contrast, selfing organisms are not  
subject to Haldane’s Sieve and are more likely to fix recessive types than  
6           outcrossers, as selfing rapidly creates homozygotes, increasing overall selec-  
tion acting on mutations. However, longer homozygous tracts in selfers also  
8           reduces the ability of recombination to create new genotypes. It is unclear  
how these two effects influence overall adaptation rates in partially selfing  
10           organisms. Here, we calculate the fixation probability of beneficial alleles if  
there is an existing selective sweep in the population. We consider both the  
12           potential loss of the second beneficial mutation if it has a weaker advantage  
than the first, and the possible replacement of the initial allele if the second  
14           mutant is fitter. Overall, loss of weaker adaptive alleles during a first select-  
ive sweep has a larger impact on preventing fixation of both mutations in  
16           highly selfing organisms. Furthermore, the presence of linked mutations has  
two opposing effects on Haldane’s Sieve. First, recessive mutants are dis-  
18           proportionally likely to be lost in outcrossers, so it is likelier that dominant  
mutations will fix. Second, with elevated rates of adaptive mutation, select-  
20           ive interference annuls the advantage in selfing organisms of not suffering  
from Haldane’s Sieve; outcrossing organisms are more able to fix weak bene-  
22           ficial mutations of any dominance value. Overall, weakened recombination  
effects can greatly limit adaptation in selfing organisms.

## 24 Introduction

Self-fertilisation – reproduction where both gametes arise from the same parent  
26 – frequently evolves from outcrossing species in nature. Self-fertilisation is wide-  
spread in angiosperms (IGIC and KOHN 2006), some groups of animals (JARNE  
28 and AULD 2006) and fungi (BILLIARD *et al.* 2011; GIOTI *et al.* 2012). It confers an  
initial benefit to an individual’s fecundity, including up to a 50% transmission ad-  
30 vantage (FISHER 1941) and reproductive assurance under mate limitation (BAKER  
1955, 1967; PANNELL *et al.* 2015). Both factors should allow selfing organisms to  
32 rapidly spread upon invasion of new habitats, unless countered by high levels of  
inbreeding depression (LANDE and SCHEMSKE 1985). However, empirical studies  
34 usually find that selfing lineages are a ‘dead end’, since back-transitions to out-  
crossing are rare, and high extinction rates have been inferred from comparative  
36 studies of related selfing-outcrossing taxa (IGIC *et al.* 2008; GOLDBERG *et al.* 2010;  
WRIGHT and BARRETT 2010; WRIGHT *et al.* 2013).

38 Self-fertilisation has therefore been posited to be detrimental in the long-  
term. For an organism with selfing rate  $\sigma$ , the population has an inbreeding  
40 rate  $F = \sigma/(2 - \sigma)$ , equivalent to WRIGHT’S (1951)  $F_{IS}$  statistic. The effective  
population size  $N_e$  is reduced by a factor of at least  $1/(1 + F)$  (POLLAK 1987;  
42 CHARLESWORTH 1992; CABALLERO and HILL 1992). Furthermore, the effective  
recombination rate is reduced in proportion to the inbreeding rate (GOLDING and  
44 STROBECK 1980; NORDBORG 2000; ROZE 2009). This joint reduction in both ef-  
fective population size and recombination can lead to a decrease in the efficacy of  
46 selection. Deleterious mutations can therefore accumulate more rapidly in selfing  
organisms, leading to population extinction (HELLER and MAYNARD SMITH 1978;

48 LYNCH *et al.* 1995).

Whether this mechanism is a major cause of extinction of self-fertilising species  
50 is still under debate (reviewed in GLÉMIN and GALTIER (2012); IGIC and BUSCH  
(2013); HARTFIELD (2016)). Some sister-species comparisons of selfing and out-  
52 crossing taxa reveal evidence of increased mutation accumulation in selfers, as  
demonstrated with either increased nonsynonymous-to-synonymous polymorph-  
54 ism ratio ( $\pi_n/\pi_s$ ), or weaker codon usage bias. Conversely, analyses of divergence  
rates generally do not show evidence for relaxed selection. Part of the reason for  
56 this lack of evidence could arise due to recent transitions to selfing in most of  
these species, as explicitly demonstrated in *Capsella rubella* by BRANDVAIN *et al.*  
58 (2013), thus leaving little time for mutation accumulation to act.

Less investigated is the idea that selfing reduces the ability of a species to  
60 adapt, especially to new environmental conditions, though it was the one ini-  
tially formulated by STEBBINS (1957). For adaptation at a single locus, selfing  
62 organisms are more likely than outcrossers to fix new recessive adaptive muta-  
tions (HALDANE 1927; CHARLESWORTH 1992) but are generally less efficient in  
64 adapting from standing variation (GLÉMIN and RONFORT 2013). Yet the effect  
of adaptation at multiple loci in partially selfing organisms has received much less  
66 attention. Of particular interest is how the reduction in recombination efficacy in  
highly selfing organisms impedes the overall adaptation rate. A well-established  
68 phenomenon in low-recombining genomes is the ‘Hill-Robertson effect’, where the  
efficacy of selection acting on a focal mutation is reduced, due to simultaneous se-  
70 lection acting on linked loci (HILL and ROBERTSON 1966; CHARLESWORTH *et al.*  
2009). Outcrossing can therefore break down these effects and unite beneficial  
72 mutations from different individuals into the same genome, greatly increasing the

adaptation rate (FISHER 1930; MULLER 1932; FELSENSTEIN 1974; OTTO and  
74 BARTON 1997).

Historically, the effect of advantageous mutations on mating system evolution  
76 has been neglected, since most observable spontaneous mutations are deleterious  
in partial selfers (SLOTTE 2014), and the inbreeding depression they cause plays a  
78 central role in mating system evolution. Analyses using divergence data from the  
*Arabidopsis* genome shows low number of genes exhibiting signatures of positive  
80 selection (BARRIER *et al.* 2003; CLARK *et al.* 2007; SLOTTE *et al.* 2010, 2011),  
and only  $\sim 1\%$  of genes have signatures of positive selection in *Medicago truncatula*  
82 (PAAPE *et al.* 2013). These analyses reflect broader findings that the proportion  
of adaptive substitutions in the coding regions of selfing plants is not significantly  
84 different from zero (GOSSMANN *et al.* 2010; HOUGH *et al.* 2013). However, wide-  
spread local adaptation to climate in *Arabidopsis* is observed (FOURNIER-LEVEL  
86 *et al.* 2011; HANCOCK *et al.* 2011; ÅGREN *et al.* 2013), which is expected to leave  
a weaker signature on the genome at the species scale (SLOTTE 2014). However,  
88 the power to detect local selection can increase once demography and population  
structure are accounted for (HUBER *et al.* 2014).

90 Finally, both outcrossing and selfing domesticated plant and crop species can  
also be used to demonstrate recent adaptation. RONFORT and GLÉMIN (2013)  
92 showed how adaptive traits obtained from quantitative trait loci tended to be dom-  
inant in outcrossers and recessive in selfers, in line with ‘Haldane’s Sieve’ (where  
94 dominant mutants are more likely to fix than recessive types in outcrossers). Hence  
while beneficial mutations may not be as frequent as deleterious alleles, there exists  
96 evidence that they arise frequently enough to impact upon local adaptation and  
domestication in self-fertilising species. Furthermore, due to the reduced effective

98 recombination rate in selfers, adaptive alleles should interfere with a greater region  
of the genome than in outcrossing organisms.

100 Recently, HARTFIELD and GLÉMIN (2014) investigated the effect of a linked de-  
leterious mutation on a selective sweep. In contrast to single-locus results, HART-  
102 FIELD and GLÉMIN (2014) demonstrated how weakly-recessive beneficial alleles  
(i.e. those with  $h$  just less than  $1/2$ ) can contribute more to fitness increases in  
104 outcrossers than selfers, as they are less likely to fix deleterious alleles via hitchhik-  
ing. This model demonstrated how breaking apart selection interference at linked  
106 sites could provide an advantage to some degree of outcrossing, leading to mixed-  
mating being the optimal evolutionary state. A multi-locus simulation study by  
108 KAMRAN-DISFANI and AGRAWAL (2014) verified that background selection im-  
pedes genome-wide adaptation rates in selfing organisms. These studies clearly  
110 showed how linkage to deleterious mutations can limit adaptation in selfers, yet it  
remains an open question as to what extent multiple beneficial mutations interfere  
112 in highly selfing species.

This article will extend previous analyses to consider how interference between  
114 beneficial mutations at linked sites affects their emergence in partially selfing spe-  
cies. Haploid two-locus analytical models of the Hill-Robertson effect are altered  
116 to take dominance and selfing into account, then examined to quantify how ad-  
aptation is affected.

## 118 Outline of the problem

### General modelling approach

120 We wish to determine how the effect of existing beneficial mutations at linked  
loci impedes the fixation of novel adaptive alleles in partially selfing organisms.  
122 We consider two locus models to ensure tractability. Notation used in this study  
is outlined in Table 1.

124 We assume a diploid population of fixed size  $N$ , so there are  $2N$  haplotypes  
present. Each haplotype consists of two linked loci with recombination occurring  
126 at a rate  $r$  between them. At a first locus  $A$ , consider a beneficial mutation  $A_1$   
with selective coefficient  $s_A$ , so the fitness of individuals carrying it is  $1 + h_A s_A$   
128 in heterozygote form, and  $1 + s_A$  in homozygote form. Similarly at a linked locus  
 $B$ , the fitness of individuals carrying the beneficial mutation  $B_1$  is  $1 + h_B s_B$  in  
130 heterozygotes and  $1 + s_B$  in homozygotes. The wild-type alleles are denoted  $A_0$ ,  
 $B_0$ ; the four haplotypes are  $A_0 B_0$ ,  $A_1 B_0$ ,  $A_0 B_1$  and  $A_1 B_1$ . We further assume that  
132 selection acts on genotypes at the diploid stage and that fitness between loci is  
additive. As an example, an individual composed of the genotype  $A_1 B_0 / A_1 B_1$  will  
134 have fitness  $1 + s_A + h_B s_B$ .

For strongly selected mutants (assuming  $2N_e h s \gg 1$ ), the trajectory of a be-  
136 neficial mutation can be decomposed into three parts. A schematic is shown in  
Figure 1. The stages are (i) a initial stochastic phase at low frequency where ex-  
138 tinction by drift is likely; (ii) conditioned on escaping initial extinction (i.e. emer-  
gence), the allele increases in frequency on a quasi-deterministic trajectory; (iii)  
140 a second stochastic phase at very high frequency where fixation is almost certain  
(KAPLAN *et al.* 1989). If two mutations segregate simultaneously at low frequency

142 in the stochastic zone, they do not influence each other and their fates can be  
assumed to be independent. However, as soon as one mutant has emerged and  
144 started to sweep quasi-deterministically it affects the fate of the other mutation.  
When considering a single unlinked mutation, once it has emerged its ultimate  
146 fixation is almost certain (which corresponds to the branching process approxi-  
mation). The probability of fixation is thus equal to the probability of emergence.  
148 However, when two (or more) mutations interfere, a mutation that has emerged  
can be replaced by a linked competitor and ultimately lost, which is well known  
150 in asexual species as the ‘clonal interference’ effect (GERRISH and LENSKI 1998).  
If so, the probability of fixation can be lower than the probability of emergence.  
152 Under tight linkage, or with a high selfing rate (as the loss of heterozygosity will  
reduce the effective recombination rate), this process has to be taken into account.

154 We assume that mutation  $A_1$  is the first to reach a high copy number and  
escape extinction by drift (although it could have been the second to arise), so is  
156 segregating in the population. Its trajectory can be modelled using deterministic  
equations. Without interference, the probability of fixation of the two mutations,  
158  $P_{AB}^*$ , is simply equal to the single-locus probability of fixation of the second muta-  
tion:

$$P_{AB}^* = P_B = 2s_B \frac{h_B + F - h_B F}{1 + F} \quad (1)$$

160 (CABALLERO and HILL 1992; CHARLESWORTH 1992).  $P_{AB}^*$  can also be defined as  
the fixation of both alleles given that  $A_1$  has already fixed in the population, hence  
162  $P_A$  does not appear. Equation 1 leads to the classical result that the probability  
of fixation is higher under outcrossing than under selfing when  $h_B > 1/2$ . More



164 generally, the emergence of mutation  $B_1$  depends on the genetic background it  
appears on, and the switching rate between backgrounds through recombination,  
166 which is the cause of the ‘Hill-Robertson’ effect we wish to model (HILL and  
ROBERTSON 1966). Denoting the actual fixation probability of both mutants as  
168  $P_{AB}(p)$ , we then define the degree of interference  $R(p)$  as the ratio  $P_{AB}(p)/P_{AB}^*$ .  
 $R(p)$  measures to what extent fixation probability is reduced due to the presence  
170 of linked mutation. For example,  $R(p) = 0.1$  means that the fixation probability  
of a linked mutant is a tenth that it would be if unlinked, given the first allele  
172 is at frequency  $p$ . Hence it is a measure of how severe selection interference is at  
impeding fixation of subsequent beneficial mutations.

174 In the simplifying case  $h_A = h_B$ , the dynamics of how the second mutation  
emerges will differ depending on whether  $s_B < s_A$  or vice versa. Hence a key  
176 parameter in the full model is the ratio  $\phi = s_B/s_A$ . If  $s_B < s_A$  ( $\phi < 1$ ), the  
dynamics of the first mutation is not influenced by the second and cannot be  
178 replaced. We thus only need to compute the emergence probability of the second  
mutation, which is likely to go extinct unless it appears on or recombines onto  
180 the background carrying the first beneficial mutation. BARTON (1995) outlined a  
general model to calculate this effect for a haploid organism. We will demonstrate  
182 how diploidy and selfing can be accounted for in that model and subsequently  
compute  $\Pi(p)$ , which is the contribution to  $R(p)$  arising from selection interference  
184 alone.

If  $s_A < s_B$  ( $\phi > 1$ ) then the second mutation can replace the first if it arises on  
186 the wild-type background, and no successful recombinant occurs. We can calculate  
the probability of this effect by adjusting the analysis of HARTFIELD and GLÉMIN  
188 (2014) to consider two beneficial mutations. We thus need to subtract from  $\Pi(p)$

the probability that mutation  $B_1$  replaces mutation  $A_1$  once it has emerged, denoted by  $\Pi_{rep}(p)$ . In the general case, the degree of interference will be given by:

$$R(p) = \Pi(p) - \Pi_{rep}(p) \quad (2)$$

In practice, instead of calculating  $R(p)$ , we instead measure  $\bar{R}$ . This is the  $R$  quantity for mutation  $B_1$  arising when mutation  $A_1$  is at a given frequency  $p$ , averaged over the whole possible origin times of the second mutation. Formal definitions of these conditions are presented below.

## **A simple first analysis: complete selfing versus outcrossing with free recombination**

Before deriving the full model, we can compare the two most extreme cases that can be investigated. Under outcrossing and free recombination, the fates of the two mutations are essentially independent. Hence the fixation probability of the second mutation, conditioned on the first having emerged, is simply the single locus probability of fixation given by Equation 1 with  $F = 0$  (HALDANE 1927). At the other extreme with complete selfing ( $F = 1$ ), recombination is suppressed so interference is maximised. Here, a second mutation can only fix if it appears on the same genetic background as the original beneficial allele, which is present at frequency  $p$ . Previous theory (HARTFIELD and OTTO 2011; HARTFIELD and GLÉMIN 2014) on emergence in this scenario gives the fixation probability of the

208 double mutant as:

$$P_{AB}(p) = P_B(p) = \frac{s_A(s_A + s_B)}{ps_A + s_B} \quad (3)$$

See Equation 7 of HARTFIELD and GLÉMIN (2014) with  $s_d = s_A$  and  $s_a = s_A + s_B$ .

210 The mean probability of fixation of both alleles thus involves integrating Equation 3  
over the entire sweep, assuming that the second mutation arises at a time that is  
212 uniformly distributed during the first sweep:

$$\bar{P}_{AB} = \frac{1}{\tau} \int_0^\tau p \cdot P_{AB}(p(t)) dt \quad (4)$$

where  $\tau$  is the duration of the first sweep. We can also solve Equation 4 over  $p$   
214 from  $p_0$  to  $1 - p_0$ ; the term inside the integral is divided by  $dp/dt = s_A p(1 - p)$   
to remove time dependence. Solving in the limit of large population size (i.e.  
216  $p_0 = 1/(2Ns) \rightarrow 0$ ) leads to  $\bar{P}_{AB} = s_B/2$  (see Supplementary Mathematica File  
S2): full linkage reduces the emergence probability by a half ( $\bar{R} = 1/2$ ). Intuitively,  
218 this can be explained by the fact that as population size increases, the deterministic  
phase of the first sweep becomes shorter compared to the initial and final stochastic  
220 phases ( $\mathcal{O}(\frac{1}{s})$  vs  $\mathcal{O}(\frac{\ln(2Ns)}{s})$ ; EWING *et al.* (2011)). The second mutation thus occurs  
roughly half of the time during the initial stochastic phase where its probability  
222 of arising on the beneficial background, hence of emerging, is very low ( $p \approx 0$   
in Equation 4). Alternatively, it can appear half of the time during the last  
224 stochastic phase where it almost always originates in the beneficial background  
and its probability of emerging is approximately  $s_B$  ( $p \approx 1$  in Equation 4).

226 By comparing this result to that with outcrossing and free recombination  
( $2h_B s_B$ ), outcrossing is more able to fix both mutants if  $h_B > 1/4$ , instead of

228  $h_B > 1/2$  without interference. However, the advantage to outcrossing may not  
be as high, since the true degree of inference depends on the strength of both  
230 mutations and the recombination rate. In addition, the degree of stochastic in-  
terference also depends on the flow of beneficial mutations, which depends on the  
232 mating system. We now turn to the full model to exactly quantify this effect.

## Modelling Framework

### 234 Deriving the reduction in emergence probability due to in- terference

236 We first need to determine  $\Pi(p)$ , the reduction in the emergence probability  
of the second mutation when it arises, given the first is at frequency  $p$ . We use  
238 branching process methods for calculating mutation emergence if acting over mul-  
tiple genetic backgrounds. In a seminal paper, BARTON (1995) outlined how to  
240 calculate the emergence probability of a focal beneficial allele that changes between  
different backgrounds in a haploid population. If the probability of switching  
242 between backgrounds is of the same order as selection coefficients,  $s$ , and differ-  
ence in emergence probability over backgrounds is of order  $s^2$ , BARTON (1995)  
244 showed that the emergence probability of a novel beneficial allele in background  $i$   
at time  $t$ ,  $Q_i$ , is a solution to the following differential equation:

$$-\frac{\partial Q_i}{\partial t} = \underbrace{s_i Q_i}_{\text{Direct selection}} + \underbrace{\left(\sum_j M_{i,j} Q_j - Q_i\right)}_{\text{Changing between backgrounds}} - \underbrace{\frac{Q_i^2}{2}}_{\text{Drift}} \quad (5)$$

246 The right-hand side of Equation 5 can be decomposed into three terms. The

first is a direct selection term: the fixation probability increases if the beneficial  
248 allele has a higher fitness advantage in background  $i$ ,  $s_i$ .  $M_{i,j}$  is the probability  
that offspring in background  $i$  moves to background  $j$  per generation; in this case,  
250 this effect arises from recombination changing the genetic background of the focal  
allele. Finally, there is a negative  $Q_i^2/2$  term, denoting how genetic drift can  
252 cause the allele to go extinct. Note that the differential equation term is negative,  
since this system of equations is considered going back in time. BARTON (1995)  
254 subsequently used this framework to investigate the fixation probability of a second  
beneficial allele, given that it arises in close linkage to an existing sweep.

256 Our goal is to derive equivalent equations for a diploid, self-fertilising popu-  
lation. In Supplementary File S1 and the Supplementary Mathematica File S2,  
258 we show how similar equations can be derived for outcrossing species. However,  
when selfing is included then the full system of equations becomes unwieldy. In  
260 order to obtain analytical solutions, we proceed by using a separation-of-timescale  
argument. When recombination is low, as assumed in Equation 5, haplotypes car-  
262 rying either the first beneficial allele or the wildtype quickly reach their genotypic  
equilibria with inbreeding (WRIGHT 1951); specifically, we assume that equilib-  
264 rium is reached between recombination events. If selection acts on genotypes, we  
can use the relative fitness advantage of each genotype to determine that of the  
266 second beneficial allele, depending on the haplotype it appears on. We can then  
create a variant of Equation 5 with these steady-state values. Using this argument,  
268 we obtain a tractable form for the transition probabilities between backgrounds  
(Supplementary File S1).

270 With high selfing rates, Equation 5 remains valid for any recombination rate  
as the probability of moving from one background to another can be low. But

272 as sweep effects can span large genetic map distances under high selfing, it is  
important to analyse this special case properly. ROZE (2009, 2015) derived the  
274 equilibrium genotype frequencies at two loci under partial selfing as a function  
of the probability of identity by descent at a single locus,  $F$ , and at two loci,  $\Phi$ .  
276 This approach takes into account correlations of homozygosity between linked loci.  
In Supplementary File S1 and Mathematica File S2, we show that  $\Phi$  equilibrates  
278 as quickly as  $F$ , so the separation-of-timescale argument can be used for any  
recombination level, assuming that two-locus equilibrium genotype frequencies for  
280 given selfing and recombination rates are instantaneously reached, compared to  
change in allele frequencies. This approximation should work well at equilibrium,  
282 but not necessary in non-equilibrium conditions such as during selective sweeps.  
However, because equilibrium values are quickly reached, these calculations are  
284 also accurate under more general conditions (see simulation results below).

To complete the model, we re-derive each component of Equation 5 in turn to  
286 account for diploidy and selfing.

**Direct selection of the second allele.** Let  $Q_1(p)$  denote the probability  
288 that the new allele fixes, given that it arises in linkage with the existing mutant  
 $A_1$  (which is at frequency  $p$ ).  $Q_0(p)$  is the fixation probability if the second allele  
290 appears on the wild-type (neutral) background. We further denote the relative se-  
lective advantage of each haplotype (either containing both advantageous alleles,  
292 or the second allele only) by  $\theta_1(p)$  and  $\theta_0(p)$ . These are derived by calculating the  
frequency of each potential haplotype background that the second allele appears  
294 on, and the relative proportions of each. Calculations are outlined in Supplement-  
ary File S1:

$$\begin{aligned}\theta_1(p) &= (F + h_B - Fh_B)s_B \\ &+ (1 - p)(F + h_A - Fh_A + (1 - F)(1 - 2h_A)p)s_A\end{aligned}\quad (6)$$

$$\begin{aligned}\theta_0(p) &= (F + h_B - Fh_B)s_B \\ &- p(F + h_A - Fh_A + (1 - F)(1 - 2h_A)p)s_A\end{aligned}\quad (7)$$

296 Note that Equations 6 and 7 are the same for both the general and the low  
recombination cases. As in BARTON (1995) the trajectory of the first mutation  $A_1$   
298 is assumed to be deterministic, and hence described by the following differential  
equation:

$$\frac{dp}{dt} = s_A p(1 - p)(F + h_A - h_A F + (1 - F)(1 - 2h_A)p) + \mathcal{O}(s_A) \quad (8)$$

300 Furthermore we can rescale time by selection, i.e. setting  $T = s_A t$  (BARTON 1995).

**Rescaling recombination.** NORDBORG (2000) used a coalescent argument  
302 to show that in selfing populations, when recombination is of order  $1/2N$ , the re-  
combination rate is scaled by a factor  $(1 - F)$  (see also GOLDING and STROBECK  
304 (1980)). This arises as a proportion  $F$  of recombination events are instantly ‘re-  
paired’ due to selfing. We show in Supplementary Mathematica File S2 that the  
306 same result can be obtained by considering the decay of linkage disequilibrium in  
an infinite population with the less restrictive condition of  $r$  being small ( $r \ll 1$ )  
308 but not necessarily  $\mathcal{O}(1/2N)$ . However, this scaling breaks down for high recom-  
bination and selfing rates, as it becomes likely that recombination occurs between  
310 genotypes within individual lineages (PADHUKASAHASRAM *et al.* 2008). Relaxing

the assumption of low recombination, we can derive a more exact rescaling term following ROZE (2009, 2015):  $r(1 - 2F + \Phi)$ , which reduces to the coalescent rescaling  $r(1 - F)$  with low recombination. The equilibrium value for  $\Phi$  can then be used (see Equation A8 in Supplementary File S1, and ROZE and LENORMAND (2005); ROZE (2009)). Furthermore, in Supplementary Mathematica File S2 we show that the error will be at most a factor  $2/(2 + F)$  with high recombination. Given that the effective recombination rate will remain small with high selfing rates irrespective of the scaling term, using the coalescent rescaling should capture the average fixation probability, but more accurate expression can be obtained using  $r(1 - 2F + \Phi)$  instead.

**Creating the system of equations.** Hence the system of equations in BARTON (1995) are modified to:

$$-\frac{\partial Q_1}{\partial T} = \theta_1 Q_1 - r(1 - F)(1 - p)(Q_1 - Q_0) - (1 + F)\frac{Q_1^2}{2} \quad (9)$$

$$-\frac{\partial Q_0}{\partial T} = \theta_0 Q_0 - r(1 - F)p(Q_0 - Q_1) - (1 + F)\frac{Q_0^2}{2} \quad (10)$$

Equations 9 and 10 account for the relative selective advantage of the second allele,  $\theta$  (with  $p$  verifying Equation 8); the decrease in effective recombination rate  $r(1 - F)$  (or  $r(1 - 2F + \Phi)$  for greater accuracy); and the  $Q^2/2$  terms are scaled by  $1 + F$  due to an increase in genetic drift (POLLAK 1987; CHARLESWORTH 1992; CABALLERO and HILL 1992).

**Calculating  $\Pi$ .** We next follow the approach of BARTON (1995) and investigate the average fixation probability over haplotypes given the first beneficial allele is at a certain frequency, defined as  $\Pi = pQ_1 + (1 - p)Q_0$ , and the difference in emergence probability between the backgrounds,  $\Delta = Q_1 - Q_0$ . These



332 terms are scaled by the probability of fixation of the second allele if unlinked,  
 $(2s_B(F + h_B - Fh_B))/(1 + F)$ , so  $\Pi$  lies between 0 and 1. We also introduce  
 334 the rescaled parameters  $\phi = s_B/s_A$  and  $\rho = r/s_A$  to determine how the relative  
 selective strengths and recombination rates affect interference. We thus obtain:

$$\frac{\partial \Pi}{\partial T} = H_B \phi (p(1-p)\Delta^2 - \Pi(1-\Pi)) \quad (11)$$

$$\begin{aligned} \frac{\partial \Delta}{\partial T} &= \Delta(\rho(1-F) - K_A(1-2p) + H_B \phi (\Delta(1-2p) + 2\Pi - 1)) \\ &- K_A \Pi \end{aligned} \quad (12)$$

336 where  $H_B = h_B + F - h_B F$  and  $K_A = h_A + F - h_A + (1-F)(1-2h_A)p$ . Note  
 that if we use the more exact recombination rescaling term  $r(1-2F+\Phi)$ , it is not  
 338 possible to fully factor out  $s_A$  from Equations 9 and 10 as  $\Phi$  is a function of  $r$ .

For a given time of origin of the second mutation,  $t$ , the joint solution of this  
 340 system and Equation 8, 11 and 12 gives  $\Pi(p(t))$ . These equations must be solved  
 numerically by, e.g., using the ‘NDSolve’ function in *Mathematica* (WOLFRAM  
 342 RESEARCH, INC. 2014). Alternatively, to remove the time dependence ( $\partial t$ ) and  
 directly obtain  $\Pi(p)$ , we can divide both Equations 11 and 12 by  $dp/dt$  (Equa-  
 344 tion 8). Boundary conditions can be found by looking at the behaviour of the  
 system as  $t \rightarrow \infty$  or  $p \rightarrow 1$ . In this case, we observe that  $\Pi \rightarrow 1$ , reflective of the  
 346 fact that as the first mutation fixes, the second allele is certain to arise alongside  
 it. Hence the second allele’s fixation probability is not reduced. Boundary condi-  
 348 tions for  $\Delta$  can be calculated by assuming  $\phi \ll 1$  (as used in BARTON (1995)) and  
 $\partial \Delta / \partial T \rightarrow 0$  as  $p \rightarrow 1$ . In this case  $\Delta$  tends to  $(1 - (1-F)h_A) / (1 - (1-F)(h_A - \rho))$ ,  
 350 which reflects the probability that the second allele can recombine onto the fitter  
 background if appearing on a wild-type chromosome, otherwise it is guaranteed to

352 be lost (BARTON 1995). Although this condition assumes small  $\phi$ , the system of  
equations appear to work well even with larger  $\phi$  when compared to simulations.

### 354 **Integration over the sweep trajectory**

To obtain the average effect of interference we need to consider all possible  
356 origins of the second mutation. The average  $R$  for mutation  $B_1$  arising uniformly  
in a long time interval  $[T_0, T_1]$  spanning the sojourn of mutation  $A_1$  is given by:

$$\bar{R} = \frac{1}{T_1 - T_0} \int_{T_0}^{T_1} \Pi(T)(p(T))dT \quad (13)$$

358 As previously showed by BARTON (1995),  $\bar{R}$  can be approximated by:

$$\bar{R} \approx 1 - \frac{1}{T_1 - T_0} \int_{-\infty}^{\infty} (1 - \Pi(T))dT = 1 - \frac{1}{T_1 - T_0} \int_0^1 \frac{(1 - \Pi(p))}{dp/dT} dp \quad (14)$$

Integration from very ancient time (equivalently, a frequency lower than  $1/2N$ )  
360 reflects the fact that mutation  $A_1$  affects the fate of mutation  $B_1$  even if it appears  
afterwards, when mutation  $B_1$  is still at a low frequency in the stochastic zone.  
362 Hence it is not obvious if a natural choice for  $T_1 - T_0$  is the sojourn time of the  
first mutation. Moreover, because selfing and dominance affect the fixation time of  
364 alleles (GLÉMIN 2012), averaging over this time would not allow direct comparison  
between different selfing rates and dominance levels. For example, the effect of  
366 linked mutation is expected to be stronger under selfing than under outcrossing  
but the time interval when interference can occur is shorter. Finally, interference  
368 also depends on the substitution rate at locus  $A$ , which is also affected by selfing

and dominance. All these effects can be taken into account by assuming a steady  
370 state of substitutions at a low rate at locus  $A$  (i.e. no multiple substitutions). The  
rate of selected substitution at locus  $A$  is given by:

$$\lambda_A = 4Nu_a \frac{h_A + F - h_A F}{1 + F} \quad (15)$$

372 where time is measured in  $1/s_A$  generations. Following BARTON (1995) we use:

$$\bar{R} \approx 1 - \lambda_A \left( \int_0^1 \frac{(1 - \Pi(p))}{dp/dT} dp \right) \quad (16)$$

The justification is as follows. The waiting time between two sweeps is expo-  
374 nentially distributed with mean  $1/\lambda_A$ . If  $T_1 - T_0 < 1/\lambda_A$ , interference between  
mutation  $A_1$  and  $B_1$  thus occurs for a proportion of time  $(T_1 - T_0)/(1/\lambda_A)$ . On  
376 average, the effect of  $A_1$  on  $B_1$  is thus:

$$(1 - \lambda_A(T_1 - T_0)) + \lambda_A(T_1 - T_0) \left( 1 - \frac{1}{T_1 - T_0} \left( \int_0^1 \frac{(1 - \Pi(p))}{dp/dT} dp \right) \right) \quad (17)$$

leading to Equation 16.

### 378 **Deriving the probability of sweep replacement, $\Pi_{rep}$**

The previous analysis focussed primarily on the case where the second mutant  
380 is weaker than the first, so  $R(p) = \Pi(p)$ . However, if selection acting on  $B_1$  is  
sufficiently strong then it is possible that  $B_1$  replaces  $A_1$ , so only  $B_1$  fixes. We  
382 need to calculate the probability of this replacement occurring and subtract it  
from the baseline reduction  $\Pi(p)$ . This probability can be calculated by altering  
384 the model of HARTFIELD and GLÉMIN (2014), which investigated a deleterious

allele hitchhiking with a sweep. In our case, the ‘deleterious’ allele is the wildtype  
 386 allele at the first locus  $A_0$ , and the ‘advantageous’ allele the second fitter sweep  
 $B_1$ . HARTFIELD and OTTO (2011) implemented a similar rescaling for a haploid  
 388 model, while YU and ETHERIDGE (2010) provided a general stochastic algorithm  
 for investigating this behaviour.

390 A fuller derivation is included in Supplementary File S1. By calculating  $R(p)$   
 from first principles, we can infer that:

$$\Pi_{rep}(p) = (1 - p)(\Pi(p) - p\Delta(p))P_{HH} \quad (18)$$

392 where  $\Pi(p)$  and  $\Delta(p)$  are given by Equations 11 and 12. Equation 6 of HARTFIELD  
 and GLÉMIN (2014) is then used to calculate  $P_{HH}$ :

$$P_{HH} = \exp\left(-\int_{q=0}^{q=1} \frac{2N\kappa(q)}{s_A dq/dT}\right) dq \quad (19)$$

394 for  $\kappa(q) = q(1 - q)r(1 - F)P_d(q)$  where  $q$  is the frequency of allele  $B_1$ . As above,  
 $r(1 - 2F + \Phi)$  can be used instead of  $r(1 - F)$  to create more precise expressions.  
 396  $P_d(q)$  is the emergence probability of the haplotype carrying both beneficial alleles  
 $(A_1B_1)$  if it formed by recombination. It is the solution of the following equation,  
 398 where  $\theta_d$  is the relative fitness of this haplotype:

$$\frac{dP_d}{dq} = \left(\theta_d(q)P_d(q) - \frac{1 + F}{2}P_d(q)^2\right) / \Delta q \quad (20)$$

The mean interference effect is similar to Equation 16. However, contrary to  
 400 emergence, the replacement of mutation  $A_1$  by mutation  $B_1$  can occur only if  
 mutation  $B_1$  arises when mutation  $A_1$  has already emerged; that is, for  $p > p_e \approx$

402  $(1 + F)/[2Ns_A(h_A + F - h_AF)]$ . This condition is a bit too restrictive because we  
should also consider the case when mutation  $A_1$  arises after but emerges before  
404 mutation  $B_1$ . Moreover, the distribution of  $p_e$  should be used instead of the average  
value. However, these complications have only minor quantitative effects (not  
406 shown). If considering replacement, Equation 16 is written as:

$$\bar{R} \approx 1 - \frac{1}{T_1 - T_0} \left( \int_0^1 \frac{(1 - \Pi(p))}{dp/dT} dp + \int_{p_e}^1 \frac{\Pi_{rep}(p)}{dp/dT} dp \right) \quad (21)$$

## Simulations

408 We tested the accuracy of analytical solutions by comparing them to stochastic  
simulations written in C; code is available as Supplementary File S3 and online  
410 from <http://github.com/MattHartfield/TwoAdvSelfSims>. When measuring  
 $\Pi$ , the first allele was seeded at initial frequency  $p$ ; given this frequency and selfing  
412 rate  $\sigma$ , the proportion of mutant homozygotes, heterozygotes, and wild-type ho-  
mozygotes were calculated based on standard equations with inbreeding (WRIGHT  
414 1951). The second allele was subsequently introduced onto a random background  
with frequency  $1/2N$  (i.e. as a single copy). Frequencies of each genotype were  
416 altered deterministically by a factor  $w_g/\bar{w}$  due to selection, where  $w_g$  is the fitness  
of each genotype and  $\bar{w}$  is the population mean fitness. Recursion equations de-  
418 rived by HEDRICK (1980, Equation 3) then calculated how genotype frequencies  
changed due to partial selfing. A life-cycle was completed by resampling  $N$  gen-  
420 otypes from a multinomial distribution to implement random drift. The second  
allele was tracked until one haplotype fixed, with the simulation repeated until  
422 5000 fixations of the second beneficial allele occurred. It was noted how often

each haplotype fixed; from this data we subsequently calculated the second allele  
424 fixation probability, relative to the expected result without interference. When  
measuring  $P_{HH}$  we instead measured how often the haplotype carrying solely the  
426 fitter mutant fixed. Confidence intervals were calculated using the method of  
AGRESTI and COULL (1998).

## 428 Results

### Validating of the analytical approach

430 **Testing II.** We first tested the accuracy of  $\Pi$ , as given by Equation 11, with  
stochastic simulations. A subset of comparisons are shown in Figure 2; fuller  
432 comparisons are given in Supplementary Mathematica File S2. We see that on the  
whole, the analytical solutions provide an accurate match with simulations for a  
434 wide variety of selfing and dominance values. This includes cases of high selfing  
and recombination, despite our model assuming low recombination. Nevertheless,  
436 simulation results mildly underestimate the original analytical solutions with very  
high values (e.g.  $F = 0.99, r > 0.2$ ; see Figure 2(f)). Using the more exact rescaled  
438 recombination rate,  $r(1 - 2F + \Phi)$ , improves the fit. Some inaccuracies are also  
apparent if the first allele is at a low frequency when the second appears ( $p \approx 0.01$ ).  
440 This discrepancy likely arises due to the trajectory of the first beneficial allele not  
being completely deterministic when starting at low frequency.

442 In addition, if the second allele is highly recessive where there is outcrossing  
( $h_B = 0.2$ ), the simulated scaled allele fixation probability can be higher than in  
444 single-loci models. This is simply because the fixation probability of recessive be-

neficial mutants are underestimated using the branching-process solution without  
446 considering homozygote genotypes (Equation 1, which holds for highly recessive  
alleles only in very large population sizes, i.e. at least  $N = 100,000$ ). For smal-  
448 ler population sizes a diffusion-equation solution,  $P_{dif}$ , offers the correct baseline  
emergence probability (CABALLERO and HILL 1992). Hence rescaling the  $h_B = 0.2$   
450 simulations by this solution,  $P_{dif}\Pi$  (instead of  $P_B\Pi$  where  $P_B$  is given by Equation  
1) causes simulations to match with analytical solutions.

452 **Testing  $\Pi_{rep}$ .** Figure 3 shows the estimate of  $\Pi_{rep}$  compared to simulation data  
if  $s_B > s_A$  and the first sweep is at frequency  $p$ . Generally, if the first mutation is  
454 not recessive, recombination is low (and/or selfing high) and  $p$  not too low (greater  
than  $1/N$ ) then the analytical solution matches up well with simulations. The fit  
456 is not improved using the  $r(1 - 2F + \Phi)$  recombination term, since the unscaled re-  
combination rate remains low ( $r \ll 1$ ). However, if recombination increases ( $2Nr$   
458 approaches 1) and mutations are recessive, then the actual replacement probab-  
ility can be underestimated (for example, with  $h_A = h_B = 0.2$ ; Figure 3(b)). By  
460 tracking the frequencies of individual haplotypes over time, we can determine that  
in cases where the model fails, it is because two key assumptions are violated (Sup-  
462 plementary Mathematica File S2). In particular, we assumed that recombination  
only occurs between haplotypes carrying one of the beneficial alleles. But in this  
464 case, the wild-type haplotype is not rapidly eliminated. Hence only a fraction of  
recombination events occurs between haplotypes carrying beneficial alleles, and  
466 Equation 19 would overestimate the effect of recombination. This error would  
not be large if net recombination is low. Furthermore, the first beneficial allele  
468 does not increase in frequency at the start of the process. This behaviour violates  
the assumption that it will compete with the second allele. These modelling vi-

470 olations are also observed if both alleles are dominant in outcrossing populations  
( $h_A = h_B = 0.8$ ; see Supplementary Mathematica File S2).

472 To calculate a more accurate replacement probability in this case, it would be  
necessary to explicitly account for the frequency of the neutral haplotype (carrying  
474 no beneficial alleles). In addition, it would be desirable to explicitly track drift  
effects as recessive beneficial mutations are present at a low frequency. Unfor-  
476 tunately it will probably be unfeasible to produce tractable analytical solutions  
in either scenario. Hence in subsequent analyses when  $\phi > 1$ , we will focus on  
478 codominant or dominant mutations ( $h \geq 1/2$ ).

## Codominant case

480 Under codominance ( $h_A = h_B = 1/2$ ), selfing has no effect on the single-  
locus fixation probabilities. Here, we can therefore analyse the effect of selfing  
482 on recombination only. Moreover, for this specific case, results can be directly  
obtained by rescaling haploid models. Equations 11 and 12 become:

$$\frac{\partial \Pi}{\partial p} = \frac{\phi((1-p)p\Delta(p)^2 - \Pi(p)(1 - \Pi(p)))}{(1-p)p} \quad (22)$$

$$\frac{\partial \Delta}{\partial p} = \frac{\Delta(p)(2\rho_F + \phi(2\Pi(p) - 1) + (1 - 2p)(\phi\Delta(p) - 1)) - \Pi(p)}{(1-p)p} \quad (23)$$

484 where  $\rho_F = \rho(1 - F)/(1 + F)$ . Equations 22, 23 are similar to BARTON'S (1995)  
6a and 6b for haploids, except with (i)  $p(1 - p)$  terms in the denominator since  
486 our equations are as a function of the first sweep frequency, and (ii) that the  
recombination rate is decreased by  $2(1 - F)/(1 + F)$ . The latter scaling reflects  
488 how the population size is increased by a factor of 2 in diploids compared to



haploids; how inbreeding magnifies drift by a factor  $1/(1 + F)$ , increasing the  
490 speed at which the first sweep fixes and reducing the potential for recombination  
to act; and how the effective recombination rate is reduced by  $1 - F$  (CABALLERO  
492 and HILL 1992). Here, we can use the approximations given by Equations 8 and  
9a of BARTON (1995) with the appropriate rescaling to find simplified forms for  
494 the total reduction in the relative fixation probability:

$$\int_0^1 \frac{(1 - \Pi(p))}{dp/dT} dp \approx -\frac{2}{1 + F} \frac{\ln(1 - \phi^{2\rho_F})}{\phi} \quad \text{for small } \phi \quad (24)$$

$$\approx \frac{2}{1 + F} \frac{1}{(\phi + 2\rho_F)^2 - 1/4} \quad \text{for large } \phi + \rho_F \quad (25)$$

Approximations for the replacement probability can also be obtained (see de-  
496 tails in Supplementary File S1). Quantitative inspection of previous equations  
shows that the emergence effect (or ‘stochastic interference’ effect) is more im-  
498 portant than the replacement effect (Figure 4). The emergence effect is higher  
for low  $\phi$  values, and can be very high; Equation 24 tends to infinity when  $\phi$  or  
500  $\rho_F$  tend towards 0. On the contrary,  $\bar{R}$  for the replacement case tends towards a  
small, finite value as  $\phi$  tends towards infinity. This difference appears because (i)  
502 mutations are more sensitive to interference in the stochastic zone than once they  
have emerged, and (ii) selection interference is more pronounced when  $\phi < 1$  than  
504 when  $\phi > 1$  (and the second allele can replace the first). Consequently, the effect  
of selfing is more important for low  $\phi$  values when emergence is the most important  
506 process, than for high  $\phi$  values when replacement predominates, as illustrated in  
Figure 4. This figure also illustrates how the effect of a sweep can extend across  
508 long chromosome tracts with high selfing rates.

In previous equations, the scaling factor  $2/(1 + F)$  arises because the length  
510 of the sweep is in  $\mathcal{O}(\frac{1+F}{2s_A})$ , but we also scaled time by  $1/s_A$  to conserve the same  
scaling for any selfing rate. Equations 24 and 25 demonstrate the two opposite  
512 effects of selfing: the reduction in effective recombination reduces the probability  
of emergence, and also increases the replacement probability but over a shorter  
514 period of time as alleles fix more quickly (GLÉMIN 2012). For loose linkage, the  
effect of selfing on recombination is stronger so that selfing globally decreases  
516 the probability of fixation. However, for tight linkage interference occurs for any  
selfing rate, such that the dominant effect of selfing is the reduction in sweep length  
518 (Figure A2 in Supplementary File S1). Boundary conditions can be found for the  
two extreme cases when  $\phi$  is either small or large. When  $\phi > 1$ , replacement  
520 is more likely under outcrossing than complete selfing if  $4Nr < 1.386 \frac{(\phi-1)^2}{\phi \ln(\phi)}$ , (see  
Supplementary Mathematica File S2). When  $\phi \ll 1$ , emergence of the second  
522 beneficial allele is more likely under selfing than outcrossing only for very tight  
linkage, that is for  $\rho < -\epsilon/4 \ln(\phi)$ , where  $\epsilon$  is the residual outcrossing rate under  
524 selfing (see Supplementary Mathematica File S2).

## Effect of dominance on interference

526 For high selfing rates, the interference process is well approximated by the ad-  
ditive case. However, to get a complete picture of the effect of selfing we need  
528 to analyse how dominance affects the process. We will first consider outcross-  
ing populations before turning to the effect of mating system on the adaptation  
530 rate. When investigating dominance, two questions arise. Which kind of muta-  
tions cause the strongest interference, and which ones are the most sensitive to

532 interference and are hence more likely to be lost?

The effect of interference for different combinations of dominance levels are  
534 presented in Figure 5 for  $\phi < 1$ . The main difference in sweep dynamics arises from  
the length of the two stochastic phases. Because a mutation causes interference  
536 mainly during its deterministic trajectory, which is similar for any dominance level  
( $\mathcal{O}(1/2N s_A)$  for any  $h_A$ ; EWING *et al.* (2011)), the dominance level of mutation  $A_1$   
538 has thus only a weak effect on the emergence probability of mutation  $B_1$ . However,  
the sensitivity of mutation  $B_1$  to interference strongly depends on its dominance  
540 level, as it depends on the length of its initial stochastic phase, which is  $\mathcal{O}(\frac{\ln(2N s_B)}{2N h_B s_B})$   
(EWING *et al.* 2011). Recessive mutations are thus more sensitive to interference  
542 than additive and dominant ones. Interference thus reinforces Haldane's Sieve,  
in the sense that recessive mutations are even less likely to emerge in outcrossing  
544 populations if tightly linked to the initial mutation.

In the case of strong interference, this effect can be substantial as illustrated  
546 in Figure 5. Interestingly, this effect is not symmetrical since dominant mutations  
only exhibit slightly less interference than additive mutations. As far as we know  
548 this effect has not been described before and leads to the prediction that the  
dominance spectrum of fixed beneficial mutations (i.e. the expected density of  
550 dominance values observed in fixed alleles) should vary with recombination rates  
(Figure A3 in Supplementary File S1).

## 552 **Conditions under which selection is more efficient under** 553 **outcrossing than under selfing**

554 We now have all the ingredients to study the range of conditions under which  
555 selfing reduces the adaptation rate. Without interference and other factors increas-  
556 ing drift in selfers, selfing reduces (respectively increases) adaptation from new  
557 dominant (respectively recessive) mutations (CHARLESWORTH 1992; CABALLERO  
558 and HILL 1992). How does interference affect this behaviour? This question can  
559 be explored by considering a steady flow of mutations and analysing  $P_{AB} = \bar{R}P_B$   
560 where  $\bar{R}$  is given by Equation 16. As shown in Supplementary Mathematica File  
561 S2, the total effect of interference on replacement will be no more than of the order  
562 of  $\ln(2Ns_A)$  (which is always lower than few tens) while the effect on emergence  
563 can be much more important. In what follows we will therefore focus on the case  
564 where  $\phi < 1$ .

565 Figure 6 illustrates how selfing can affect the probability of fixation of the  
566 second mutation compared to the single locus case. Under a low adaptation re-  
567 gime ( $4Nu_a = \Theta = 0.02$ , for  $u_a$  the per-locus beneficial mutation rate) interference  
568 is weak and the probability of fixation is reduced only in highly selfing species. This  
569 reduction is moderate and selfing species are still better than outcrossers at fixing  
570 recessive mutations. Under a stronger adaptation regime ( $\Theta = 0.2$ ), interference  
571 can be substantial even in mixed mating species and adaptation can be fully im-  
572 peded in highly selfing species if  $\lambda_A > 1 / \int_0^1 \frac{(1-\Pi(p))}{dp/dT} dp$  (see BARTON (1995)). This  
573 threshold depends on  $\phi$ , which means that, even under a low adaptation regime,  
574 weakly beneficial mutations can be affected by interference in highly selfing species.  
575 Figure 7 shows the joint dominance and selection spectrum for which selection is

576 more efficient in outcrossing than in highly selfing ( $F = 0.95$ ) species. Strongly  
beneficial mutations are very weakly affected by interference, so only dominant  
578 mutations are more efficiently selected in outcrossing than in selfing species. How-  
ever, (very) weak beneficial mutations are better fixed in outcrossing populations,  
580 whatever their dominance level.

## Discussion

### 582 **Interference between beneficial mutations with partial self- ing and dominance**

584 Multi-locus models of adaptation in partial self-fertilising species can inform  
on how the interplay between homozygote creation, and reduction in recombin-  
586 ation, jointly affect selection acting on multiple sites. It is already known that  
the presence of linked deleterious variation means that mildly recessive benefi-  
588 cial mutations ( $h$  just less than  $1/2$ ) are more able to fix in outcrossers than in  
selfing organisms by recombining away from the deleterious allele, in contrast to  
590 single locus theory (HARTFIELD and GLÉMIN 2014). More generally, genome wide  
background selection can substantially reduce adaptation in highly selfing species  
592 (KAMRAN-DISFANI and AGRAWAL 2014). Yet the extent that linkage between be-  
neficial mutations impacts upon mating-system evolution remains poorly known.

594 Here we extended several previous models of selection interference to consider  
how adaptation is impeded in partially-selfing organisms. We considered two pos-  
596 sibilities. First, given that an existing sweep is progressing through the population,  
subsequent mutations confer a lesser selective advantage and can only fix if recom-

598 binning onto the fitter genetic background (the ‘emergence’ effect). Alternatively,  
a second mutant could be fitter and replace the existing sweep, unless recombina-  
600 tion unites the two alleles (the ‘replacement’ effect). We found that the emergence  
effect is generally stronger than the replacement effect, and is more likely to lead  
602 to loss of beneficial mutations (Figure 4).

Furthermore, selection interference has two opposite effects on Haldane’s Sieve.  
604 In mainly outcrossing populations (where it operates), Haldane’s Sieve is reinforced  
because recessive mutations are even more likely to be lost when rare compared  
606 to dominant ones, compared to single locus results. However, when comparing  
different mating systems, interference reduces or nullifies the advantage of selfing  
608 of not being affected by Haldane’s Sieve. Consequently, weakly-beneficial muta-  
tions are more likely to be fixed in outcrossers, irrespective of their dominance  
610 level (Figure 7). These findings thus contribute to a body of literature as to when  
the predictions of Haldane’s Sieve should break down, or otherwise be altered.  
612 Other examples include the fixation probability of mutations being independent  
from dominance if arising from previously deleterious variation (ORR and BETAN-  
614 COURT 2001); more generally, outcrossers are more able to fix mutations with any  
dominance level compared to selfers if arising from standing variation, and when  
616 multiple linked deleterious variants are present (GLÉMIN and RONFORT 2013).  
Conversely, dominant mutations can be lost in metapopulations due to strong  
618 drift effects (PANNELL *et al.* 2005).

In our model we assumed that no more than two beneficial mutations simul-  
620 taneously interfere in the population. However, even if mutation does not occur  
frequently enough to lead to multiple mutations interfering under outcrossing, the  
622 presence of a few sweeping mutations throughout a genome can jointly interfere

in highly selfing species. Obtaining a general model of multiple substitutions in a  
624 diploid partially selfing population is a difficult task, but it is likely that the rate  
of adaptation would be further reduced compared to the two-locus predictions (as  
626 found in haploid populations by WEISSMAN and BARTON (2012)).

It is also of interest to ask whether our calculations hold with different types  
628 of inbreeding (such as sib mating). For a single unlinked mutant, CABALLERO  
and HILL (1992) showed how various inbreeding regimes determine the value of  
630  $F$  used in calculating fixation probabilities (Equation 1). However, it is unclear  
how effective recombination rates will be affected. For example, NORDBORG'S  
632 (2000) rescaling argument relies on the proportion of recombination events that  
are instantly 'repaired' by direct self-fertilisation; these dynamics would surely be  
634 different under alternative inbreeding scenarios. Further work would be necessary  
to determine how other types of inbreeding affect net recombination rates, and  
636 thus the ability for selection interference to be broken down.

## Causes of limits to adaptation in selfing species

638 We have already shown in a previous paper how adaptation can be impeded in  
low-recombining selfing species due to the hitch-hiking of linked deleterious muta-  
640 tions (HARTFIELD and GLÉMIN 2014), with KAMRAN-DISFANI and AGRAWAL  
(2014) demonstrating that background selection can also greatly limit adaptation.  
642 Hence the question arises as to whether deleterious mutations or multiple sweeps  
are more likely to impede overall adaptation rates in selfing species.

644 Background selection causes a general reduction in variation across the genome  
by reducing  $N_e$  (NORDBORG *et al.* 1996); here the overall reduction in emergence

646 probability is proportional to  $N_e/N$ , where  $N_e$  is mediated by the strength and  
rate of deleterious mutations (BARTON 1995; JOHNSON and BARTON 2002), and  
648 thus affects all mutations in the same way. Because of background selection, selfing  
is thus expected to globally reduce adaptation without affecting the spectrum of  
650 fixed mutations. Similarly, adaptation from standing variation, which depends on  
polymorphism level, is expected to be affected by the same proportion (GLÉMIN  
652 and RONFORT 2013). Alternatively, interference between beneficial mutations is  
mediated by  $\phi$ , the ratio of the selection coefficients of the sweeps. For a given  
654 selective effect at locus  $A$ , weak mutations at locus  $B$  are thus more affected by  
interference than stronger ones, and the net effect of interference cannot be sum-  
656 marised by a single change in  $N_e$  (BARTON 1995; WEISSMAN and BARTON 2012).  
Because of selective interference, selfing is also expected to shift the spectrum  
658 of fixed mutations towards those of strong effects. Interestingly, WEISSMAN and  
BARTON (2012) showed that neutral polymorphism can be significantly reduced  
660 by multiple sweeps, even if they do not interfere among themselves. This suggests  
that in selfing species, adaptation from standing variation should be more limited  
662 than predicted by single-locus theory (GLÉMIN and RONFORT 2013). Selective  
interference could thus affect both the number and type of adaptations observed  
664 in selfing species.

Reflecting on this logic, both processes should interact and we therefore predict  
666 that background selection will have a diminishing-returns effect. As background  
selection lowers  $N_e$  then the substitution rate of beneficial mutations will be re-  
668 duced (since it is proportional to  $N_e\mu$  for  $\mu$  the per-site mutation rate), hence  
interference between beneficial mutations will subsequently be alleviated. No such  
670 respite will be available with a higher adaptive mutation rate; on the contrary,



interference will increase (Figure 6). Impediment of adaptive alleles should play a  
672 strong role in reducing the fitness of selfing species, causing them to be an evolutionary dead-end. Further theoretical work teasing apart these effects would be  
674 desirable. Given the complexity of such analyses, simulation studies similar to those of KAMRAN-DISFANI and AGRAWAL (2014) would be a useful approach to  
676 answering this question.

In a recent study, LANDE and PORCHER (2015) demonstrated that once the  
678 selfing rate became critically high, selfing organisms then purged a large amount of quantitative trait variation, limiting their ability to respond to selection in a changing  
680 environment. This mechanism provides an alternative basis as to how selfing organisms are an evolutionary dead-end. However, they only consider populations  
682 at equilibrium; our results suggest that directional selection should further reduce quantitative genetic variation due to selective interference among mutations.  
684 Subsequent theoretical work is needed to determine the impact of interference via sweeps on the loss of quantitative variation. Furthermore, complex organisms  
686 (i.e. those where many loci underlie phenotypic selection) are less likely to adapt to a moving optimum compared to when only a few traits are under selection  
688 (MATUSZEWSKI *et al.* 2014), and can also purge genetic variance for lower selfing rates (LANDE and PORCHER 2015). Complex selfing organisms should thus be  
690 less able to adapt to environmental changes.

## Empirical Implications

692 The models derived here lead to several testable predictions for the rate of adaptation between selfing and outcrossing sister-species. These include an overall

694 reduction in the adaptive substitution rate in selfing populations; a shift in the  
distribution of fitness effects in selfing organisms to only include strongly-selected  
696 mutations that escape interference; and a difference in the dominance spectrum  
of adaptive mutations in outcrossers compared to selfers, as already predicted by  
698 single-locus theory (CHARLESWORTH 1992) and observed with quantitative trait  
loci (QTLs) for domesticated crops (RONFORT and GLÉMIN 2013).

700 So far, few studies currently exist that directly compare adaptation rates and  
potential between related selfing and outcrossing species, but they are in agreement  
702 with the predictions of the model. In plants, the self-incompatible *Capsella grandiflora*  
exhibited much higher adaptation rates (where  $\alpha = 40\%$  of non-synonymous  
704 substitutions were estimated to be driven by positive selection using the McDonald-  
Kreitman statistic; SLOTTE *et al.* (2010)) than in the related selfing species *Arabi-*  
706 *bidopsis thaliana* (where  $\alpha$  is not significantly different from zero). Similarly, the  
outcrossing snail *Physa acuta* exhibited significant adaptation rates ( $\alpha = 0.54$ ),  
708 while no evidence for adaptation in the selfing snail was obtained (BURGARELLA  
*et al.* 2015); in fact, evidence suggests that deleterious mutations segregate due  
710 to drift ( $\alpha = -0.19$ ). In agreement with the predicted inefficacy of selection on  
weak mutations, QIU *et al.* (2011) also observed significantly lower selection on  
712 codon usage in the *Capsella* and *Arabidopsis* selfers than in their outcrossing sister  
species.

714 In addition, as only strong advantageous mutations are expected to escape loss  
through selection interference, this result can explain why selective sweeps cover-  
716 ing large tracts of a genome are commonly observed, as with *Arabidopsis thaliana*  
(LONG *et al.* 2013) and *Caenorhabditis elegans* (ANDERSEN *et al.* 2012). Extended  
718 sweep signatures can also be explained by reduced effective recombination rates in

selfing genomes. Finally, selective interference between beneficial mutations could  
720 explain why maladaptive QTLs are observed as underlying fitness components,  
as detected in *Arabidopsis thaliana* (ÅGREN *et al.* 2013). Direct QTL compar-  
722 isons between selfing and outcrossing sister species would therefore be desirable to  
determine to what extent selection interference leads to maladaptation in selfing  
724 species.

*Acknowledgements:* M.H. was funded by an ATIP-Avenir grant from CNRS  
726 and INSERM to Samuel Alizon, a Marie Curie International Outgoing Fellowship  
grant number MC-IOF-622936 (project SEXSEL), and also acknowledges addi-  
728 tional support from the CNRS and the IRD. S.G. is supported by the French  
CNRS and a Marie Curie Intra-European Fellowship, grant number IEF-623486  
730 (project SELFADAPT). This work was also supported by two grants from the  
Agence Nationale de la Recherche (TRANS: ANR-11-BSV7-013-03 and SEAD:  
732 ANR-13-ADAP-0011). We thank Joachim Hermisson, Denis Roze and an an-  
onymous reviewer for their very helpful comments on the manuscript.

## 734 Literature Cited

- ÅGREN, J., C. G. OAKLEY, J. K. MCKAY, J. T. LOVELL, and D. W. SCHEM-  
736 SKE, 2013 Genetic mapping of adaptation reveals fitness tradeoffs in *Arabidopsis*  
*thaliana*. *Proc. Natl. Acad. Sci. USA* **110**: 21077–21082.
- 738 AGRESTI, A., and B. A. COULL, 1998 Approximate is better than “exact” for  
interval estimation of binomial proportions. *Am. Stat.* **52**: 119–126.

740 ANDERSEN, E. C., J. P. GERKE, J. A. SHAPIRO, J. R. CRISSMAN, R. GHOSH,  
et al., 2012 Chromosome-scale selective sweeps shape *Caenorhabditis elegans*  
742 genomic diversity. *Nat. Genet.* **44**: 285–290.

BAKER, H. G., 1955 Self-compatibility and establishment after ‘long-distance’  
744 dispersal. *Evolution* **9**: 347–349.

BAKER, H. G., 1967 Support for Baker’s Law—As a Rule. *Evolution* **21**: 853–856.

746 BARRIER, M., C. D. BUSTAMANTE, J. YU, and M. D. PURUGGANAN, 2003  
Selection on Rapidly Evolving Proteins in the *Arabidopsis* Genome. *Genetics*  
748 **163**: 723–733.

BARTON, N. H., 1995 Linkage and the limits to natural selection. *Genetics* **140**:  
750 821–841.

BILLIARD, S., M. LÓPEZ-VILLAVICENCIO, B. DEVIÉ, M. E. HOOD, C. FAIR-  
752 HEAD, et al., 2011 Having sex, yes, but with whom? Inferences from fungi on  
the evolution of anisogamy and mating types. *Biol. Rev. Camb. Philos. Soc.* **86**:  
754 421–442.

BRANDVAIN, Y., T. SLOTTE, K. M. HAZZOURI, S. I. WRIGHT, and G. COOP,  
756 2013 Genomic identification of founding haplotypes reveals the history of the  
selfing species *Capsella rubella*. *PLoS Genet.* **9**: e1003754.

758 BURGARELLA, C., P. GAYRAL, M. BALLENGHIEN, A. BERNARD, P. DAVID,  
et al., 2015 Molecular evolution of freshwater snails with contrasting mating  
760 systems. *Mol. Biol. Evol.* **32**: 2403–2416.

- CABALLERO, A., and W. G. HILL, 1992 Effects of partial inbreeding on fixation  
762 rates and variation of mutant genes. *Genetics* **131**: 493–507.
- CHARLESWORTH, B., 1992 Evolutionary rates in partially self-fertilizing species.  
764 *Am. Nat.* **140**: 126–148.
- CHARLESWORTH, B., A. J. BETANCOURT, V. B. KAISER, and I. GORDO,  
766 2009 Genetic recombination and molecular evolution. *Cold Spring Harb. Symp.*  
*Quant. Biol.* **74**: 177–186.
- 768 CLARK, R. M., G. SCHWEIKERT, C. TOOMAJIAN, S. OSSOWSKI, G. ZELLER,  
*et al.*, 2007 Common Sequence Polymorphisms Shaping Genetic Diversity in  
770 *Arabidopsis thaliana*. *Science* **317**: 338–342.
- EWING, G., J. HERMISSON, P. PFAFFELHUBER, and J. RUDOLF, 2011 Selective  
772 sweeps for recessive alleles and for other modes of dominance. *J. Math. Bio.* **63**:  
399–431.
- 774 FELSENSTEIN, J., 1974 The evolutionary advantage of recombination. *Genetics*  
**78**: 737–756.
- 776 FISHER, R. A., 1930 *The genetical theory of natural selection*. The Clarendon  
Press, Oxford.
- 778 FISHER, R. A., 1941 Average excess and average effect of a gene substitution.  
*Ann. Eugen.* **11**: 53–63.
- 780 FOURNIER-LEVEL, A., A. KORTE, M. D. COOPER, M. NORDBORG,  
J. SCHMITT, *et al.*, 2011 A map of local adaptation in *Arabidopsis thaliana*.  
782 *Science* **334**: 86–89.

- GERRISH, P. J., and R. LENSKI, 1998 The fate of competing beneficial mutations  
784 in an asexual population. *Genetica* **102–103**: 127–144.
- GIOTI, A., A. A. MUSHEGIAN, R. STRANDBERG, J. E. STAJICH, and H. JOHAN-  
786 NESSON, 2012 Unidirectional evolutionary transitions in fungal mating systems  
and the role of transposable elements. *Mol. Biol. Evol.* **29**: 3215–3226.
- 788 GLÉMIN, S., 2012 Extinction and fixation times with dominance and inbreeding.  
*Theor. Popul. Biol.* **81**: 310–316.
- 790 GLÉMIN, S., and N. GALTIER, 2012 Genome evolution in outcrossing versus self-  
ing versus asexual species. In M. Anisimova, editor, *Methods Mol. Biol.*, volume  
792 855, chapter 11. Humana Press, 311–335.
- GLÉMIN, S., and J. RONFORT, 2013 Adaptation and maladaptation in selfing  
794 and outcrossing species: New mutations versus standing variation. *Evolution*  
**67**: 225–240.
- 796 GOLDBERG, E. E., J. R. KOHN, R. LANDE, K. A. ROBERTSON, S. A. SMITH,  
*et al.*, 2010 Species selection maintains self-incompatibility. *Science* **330**: 493–  
798 495.
- GOLDING, G. B., and C. STROBECK, 1980 Linkage disequilibrium in a finite  
800 population that is partially selfing. *Genetics* **94**: 777–789.
- GOSSMANN, T. I., B.-H. SONG, A. J. WINDSOR, T. MITCHELL-OLDS, C. J.  
802 DIXON, *et al.*, 2010 Genome wide analyses reveal little evidence for adaptive  
evolution in many plant species. *Mol. Biol. Evol.* **27**: 1822–1832.

- 804 HALDANE, J. B. S., 1927 A mathematical theory of natural and artificial selection,  
part V: Selection and mutation. *Math. Proc. Cambridge Philos. Soc.* **23**: 838–  
806 844.
- HANCOCK, A. M., B. BRACHI, N. FAURE, M. W. HORTON, L. B. JARYMOW-  
808 YCZ, *et al.*, 2011 Adaptation to climate across the *Arabidopsis thaliana* genome.  
*Science* **334**: 83–86.
- 810 HARTFIELD, M., 2016 Evolutionary genetic consequences of facultative sex and  
outcrossing. *J. Evol. Biol.* **29**: 5–22.
- 812 HARTFIELD, M., and S. GLÉMIN, 2014 Hitchhiking of deleterious alleles and the  
cost of adaptation in partially selfing species. *Genetics* **196**: 281–293.
- 814 HARTFIELD, M., and S. P. OTTO, 2011 Recombination and hitchhiking of dele-  
terious alleles. *Evolution* **65**: 2421–2434.
- 816 HEDRICK, P. W., 1980 Hitchhiking: A comparison of linkage and partial selection.  
*Genetics* **94**: 791–808.
- 818 HELLER, R., and J. MAYNARD SMITH, 1978 Does Muller’s ratchet work with  
selfing? *Genet. Res.* **32**: 289–293.
- 820 HILL, W. G., and A. ROBERTSON, 1966 The effect of linkage on limits to artificial  
selection. *Genet. Res.* **8**: 269–294.
- 822 HOUGH, J., R. J. WILLIAMSON, and S. I. WRIGHT, 2013 Patterns of selection  
in plant genomes. *Annu. Rev. Ecol. Evol. Syst.* **44**: 31–49.

- 824 HUBER, C. D., M. NORDBORG, J. HERMISSON, and I. HELLMANN, 2014 Keeping  
It Local: Evidence for Positive Selection in Swedish *Arabidopsis thaliana*. Mol.  
826 Biol. Evol. **31**: 3026–3039.
- IGIC, B., and J. W. BUSCH, 2013 Is self-fertilization an evolutionary dead end?  
828 New Phytol. **198**: 386–397.
- IGIC, B., and J. R. KOHN, 2006 The distribution of plant mating systems: study  
830 bias against obligately outcrossing species. Evolution **60**: 1098–1103.
- IGIC, B., R. LANDE, and J. R. KOHN, 2008 Loss of Self-Incompatibility and Its  
832 Evolutionary Consequences. Int. J. Plant Sci. **169**: 93–104.
- JARNE, P., and J. R. AULD, 2006 Animals mix it up too: the distribution of  
834 self-fertilization among hermaphroditic animals. Evolution **60**: 1816–1824.
- JOHNSON, T., and N. H. BARTON, 2002 The effect of deleterious alleles on ad-  
836 aptation in asexual populations. Genetics **162**: 395–411.
- KAMRAN-DISFANI, A., and A. F. AGRAWAL, 2014 Selfing, adaptation and back-  
838 ground selection in finite populations. J. Evol. Biol. **27**: 1360–1371.
- KAPLAN, N. L., R. R. HUDSON, and C. H. LANGLEY, 1989 The “hitchhiking  
840 effect” revisited. Genetics **123**: 887–899.
- LANDE, R., and E. PORCHER, 2015 Maintenance of quantitative genetic variance  
842 under partial self-fertilization, with implications for evolution of selfing. Genetics  
**200**: 891–906.
- 844 LANDE, R., and D. W. SCHEMSKE, 1985 The Evolution of Self-Fertilization and  
Inbreeding Depression in Plants. I. Genetic Models. Evolution **39**: 24–40.



- 846 LONG, Q., F. A. RABANAL, D. MENG, C. D. HUBER, A. FARLOW, *et al.*, 2013  
Massive genomic variation and strong selection in *Arabidopsis thaliana* lines  
848 from Sweden. *Nat. Genet.* **45**: 884–890.
- LYNCH, M., J. CONERY, and R. BURGER, 1995 Mutation accumulation and the  
850 extinction of small populations. *Am. Nat.* **146**: 489–518.
- MATUSZEWSKI, S., J. HERMISSON, and M. KOPP, 2014 Fisher’s geometric model  
852 with a moving optimum. *Evolution* **68**: 2571–2588.
- MULLER, H. J., 1932 Some genetic aspects of sex. *Am. Nat.* **66**: 118–138.
- 854 NORDBORG, M., 2000 Linkage disequilibrium, gene trees and selfing: An ancestral  
recombination graph with partial self-fertilization. *Genetics* **154**: 923–929.
- 856 NORDBORG, M., B. CHARLESWORTH, and D. CHARLESWORTH, 1996 The effect  
of recombination on background selection. *Genet. Res.* **67**: 159–174.
- 858 ORR, H. A., and A. J. BETANCOURT, 2001 Haldane’s sieve and adaptation from  
the standing genetic variation. *Genetics* **157**: 875–884.
- 860 OTTO, S. P., and N. H. BARTON, 1997 The evolution of recombination: Remov-  
ing the limits to natural selection. *Genetics* **147**: 879–906.
- 862 PAAPE, T., T. BATAILLON, P. ZHOU, T. J. Y. KONO, R. BRISKINE, *et al.*,  
2013 Selection, genome-wide fitness effects and evolutionary rates in the model  
864 legume *Medicago truncatula*. *Mol. Ecol.* **22**: 3525–3538.
- PADHUKASAHASRAM, B., P. MARJORAM, J. D. WALL, C. D. BUSTAMANTE,  
866 and M. NORDBORG, 2008 Exploring population genetic models with recombin-  
ation using efficient forward-time simulations. *Genetics* **178**: 2417–2427.

- 868 PANNELL, J. R., J. R. AULD, Y. BRANDVAIN, M. BURD, J. W. BUSCH, *et al.*,  
2015 The scope of Baker's law. *New Phytol.* **208**: 656–667.
- 870 PANNELL, J. R., M. E. DORKEN, and S. M. EPPLEY, 2005 'Haldane's Sieve' in  
a metapopulation: sifting through plant reproductive polymorphisms. *Trends*  
872 *Ecol. Evol.* **20**: 374–379.
- POLLAK, E., 1987 On the theory of partially inbreeding finite populations. I.  
874 Partial selfing. *Genetics* **117**: 353–360.
- QIU, S., K. ZENG, T. SLOTTE, S. WRIGHT, and D. CHARLESWORTH, 2011  
876 Reduced efficacy of natural selection on codon usage bias in selfing *Arabidopsis*  
and *Capsella* species. *Genome Biol. Evol.* **3**: 868–880.
- 878 RONFORT, J., and S. GLÉMIN, 2013 Mating System, Haldane's Sieve, and the  
Domestication Process. *Evolution* **67**: 1518–1526.
- 880 ROZE, D., 2009 Diploidy, population structure, and the evolution of recombina-  
tion. *Am. Nat.* **174**: S79–S94.
- 882 ROZE, D., 2015 Effects of interference between selected loci on the mutation load,  
inbreeding depression, and heterosis. *Genetics* **201**: 745–757.
- 884 ROZE, D., and T. LENORMAND, 2005 Self-fertilization and the evolution of re-  
combination. *Genetics* **170**: 841–857.
- 886 SLOTTE, T., 2014 The impact of linked selection on plant genomic variation. *Brief.*  
*Funct. Genomics* **13**: 268–275.

888 SLOTTE, T., T. BATAILLON, T. T. HANSEN, K. ST. ONGE, S. I. WRIGHT,  
et al., 2011 Genomic determinants of protein evolution and polymorphism in  
890 *Arabidopsis*. *Genome Biol. Evol.* **3**: 1210–1219.

SLOTTE, T., J. P. FOXE, K. M. HAZZOURI, and S. I. WRIGHT, 2010 Genome-  
892 Wide Evidence for Efficient Positive and Purifying Selection in *Capsella gran-*  
*diflora*, a Plant Species with a Large Effective Population Size. *Mol. Biol. Evol.*  
894 **27**: 1813–1821.

STEBBINS, G. L., 1957 Self fertilization and population variability in the higher  
896 plants. *Am. Nat.* **91**: 337–354.

WEISSMAN, D. B., and N. H. BARTON, 2012 Limits to the rate of adaptive  
898 substitution in sexual populations. *PLoS Genet.* **8**: e1002740.

WOLFRAM RESEARCH, INC., 2014 *Mathematica Edition: Version 10.0*. Wolfram  
900 Research, Inc., Champaign, Illinois.

WRIGHT, S., 1951 The genetical structure of populations. *Ann. Eugen.* **15**: 323–  
902 354.

WRIGHT, S. I., and S. C. H. BARRETT, 2010 The long-term benefits of self-  
904 rejection. *Science* **330**: 459–460.

WRIGHT, S. I., S. KALISZ, and T. SLOTTE, 2013 Evolutionary consequences of  
906 self-fertilization in plants. *Proc. R. Soc. B* **280**: 20130133.

YU, F., and A. M. ETHERIDGE, 2010 The fixation probability of two competing  
908 beneficial mutations. *Theor. Popul. Biol.* **78**: 36–45.

Table 1: Glossary of Notation.

| Symbol                     | Usage                                                                                                 |
|----------------------------|-------------------------------------------------------------------------------------------------------|
| $2N$                       | Number of haplotypes in the population (of size $N$ )                                                 |
| $A, B$                     | Locus at which first, second beneficial allele arises                                                 |
| $r$                        | Recombination rate between two loci                                                                   |
| $s_A, s_B$                 | Fitness coefficients of original and new advantageous alleles                                         |
| $h_A, h_B$                 | Dominance coefficients of original and new advantageous alleles                                       |
| $p$                        | Frequency of first advantageous allele at timepoint                                                   |
| $q$                        | Frequency of second advantageous allele at timepoint (if $s_A < s_B$ )                                |
| $\sigma$                   | Proportion of matings that are self-fertilising                                                       |
| $F$                        | WRIGHT'S (1951) inbreeding coefficient, $\sigma/(2 - \sigma)$                                         |
| $\Phi$                     | Probability of identity by descent at two loci (ROZE 2009)                                            |
| $P_A(p), P_B(p)$           | Fixation probability of original and new allele if unaffected by linkage (Equation 1)                 |
| $P_{AB}^*$                 | Fixation probability of both mutants in absence of interference                                       |
| $P_{AB}(p)$                | Actual fixation probability of both mutants, after accounting for interference                        |
| $\bar{P}_{AB}$             | Average $P_{AB}$ over one or several selected substitutions at locus $A$                              |
| $R(p)$                     | Ratio of actual to non-interference double-allele fixation probability, $P_{AB}/P_{AB}^*$             |
| $\bar{R}$                  | Average $R$ over one or several selected substitutions at locus $A$                                   |
| $P_{HH}$                   | Fixation probability of second allele with wildtype background                                        |
| $P_d(q)$                   | Fixation probability of haplotype carrying both sweeps                                                |
| $\tau$                     | Time taken for first sweep to reach frequency $p$                                                     |
| $T$                        | Scaled time, $s_A t$                                                                                  |
| $\Pi(p)$                   | Average fixation probability of second allele if it does not replace the first sweep                  |
| $\Pi_{rep}(p)$             | Probability that second sweep replaces first if $s_B > s_A$                                           |
| $Q_0(p), Q_1(p)$           | Fixation probability of novel allele if appearing on neutral or already beneficial genetic background |
| $\theta_1(p), \theta_0(p)$ | Relative selective advantage of second allele, if residing on either beneficial or neutral background |
| $\theta_a(q)$              | Relative selective advantage of recombinant haplotype carrying both alleles                           |
| $\Delta$                   | Difference in fixation probability between different backgrounds, $Q_1 - Q_0$                         |
| $\phi$                     | Scaled advantage of new beneficial allele, $s_B/s_A$                                                  |
| $\rho$                     | Scaled recombination rate, $r/s_A$                                                                    |
| $\lambda_A$                | Rate of selected substitution at locus $A$                                                            |
| $\Theta$                   | Population rate of beneficial mutation at single locus, $4Nu_a$                                       |

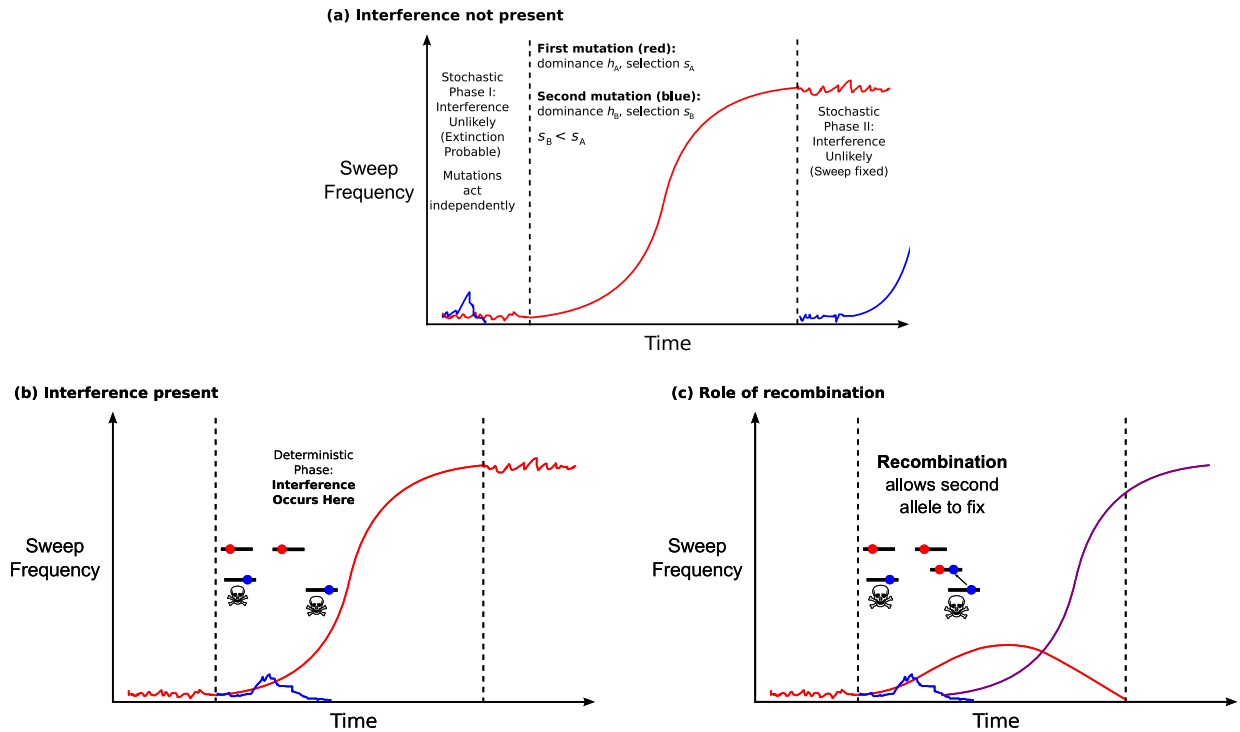

Figure 1: Schematic of the model for the case  $s_B < s_A$ , i.e. the second mutant is weaker than the first. We assume  $h_A = h_B$  here for simplicity. (a) The red line denotes the frequency of the initial beneficial mutation over time. When it is at low ( $p \sim 1/2N$ ) and high ( $p \sim (1 - 1/2N)$ ) frequencies, changes in frequency are determined stochastically. Any linked beneficial alleles that appear during these phases will act independently as one genetic background dominates that the second mutant can appear on. (b) Once the first allele is sufficiently prevalent, it will increase in frequency over time in a regular manner (the ‘deterministic’ phase). Any secondary alleles that appear during this phase will be impacted by selection interference, so will be less likely to fix even if they do emerge. These alleles are represented by blue dots, with the trajectory shown by a blue line. (c) Interference can be broken down if recombination moves the blue allele onto the fitter background containing the red allele, and this new haplotype (whose frequency is shown by a purple line) emerges in the population.

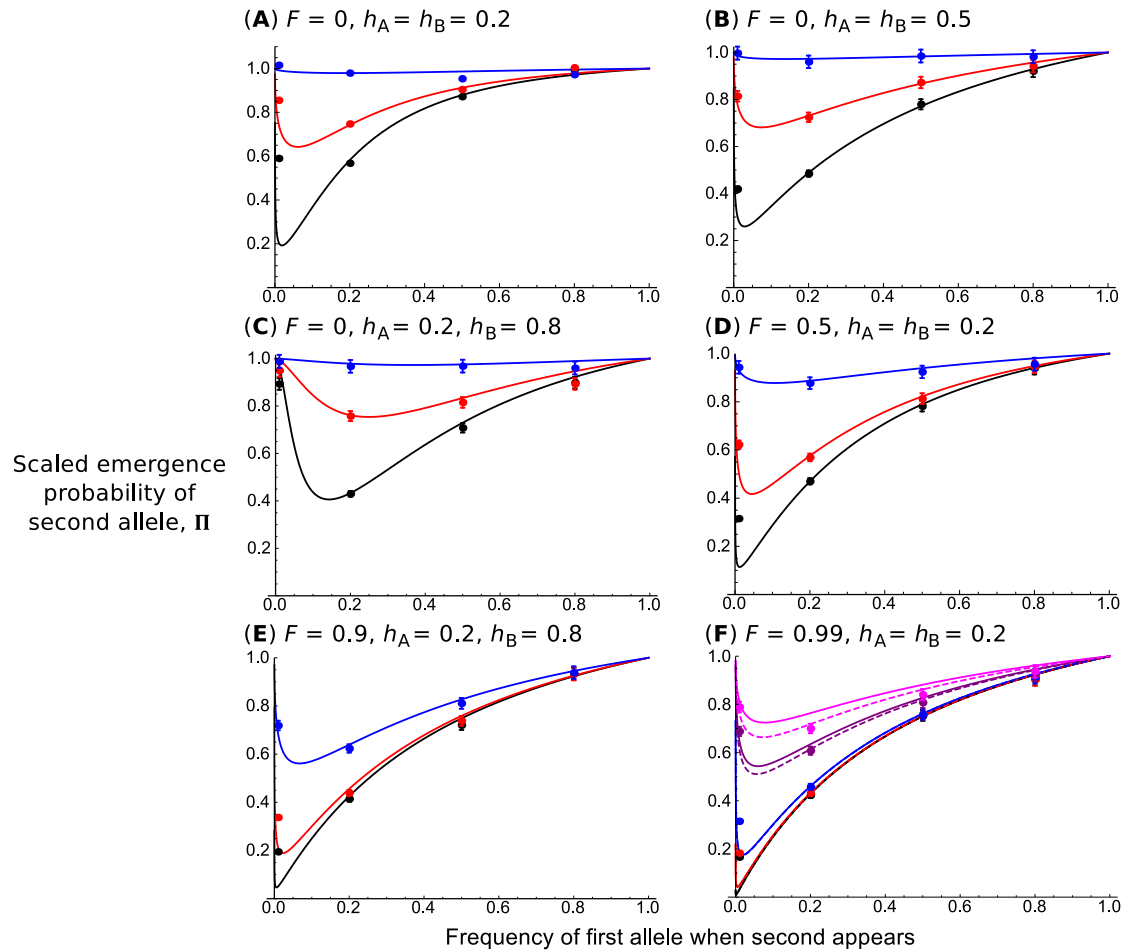

Figure 2: Probability of fixation of the second allele relative to the unlinked case,  $\Pi$ , as a function of the first allele frequency,  $p$ .  $N = 10,000$ ,  $s_A = 0.01$ ,  $s_B = 0.005$  (so  $\phi = 0.5$ ), and from bottom to top in (a)–(d):  $r = 0.0001, 0.001, 0.01$  (corresponding to  $\rho = 0.01, 0.1, 1$ ). In (f), there are also  $r = 0.1$  and  $0.25$  results added (corresponding to  $\rho = 10$  and  $25$ ). Other parameters used are listed above each subplot. Curves correspond to solutions provided by analytical system of differential equations (Equation 11), rescaled so it is a function of  $p$  instead. In (f), dashed lines are analytical results using the more exact recombination rate,  $r(1 - 2F + \Phi)$ . Points corresponds to 5,000 stochastic simulations for which the second beneficial allele has fixed. Bars represent 95% confidence intervals; if they intervals cannot be seen, they lie within the plotted points. Note that in panel (a), simulation results are presented after rescaling fixation probability by the diffusion equation solution, to account for recessive alleles (see main text for details).

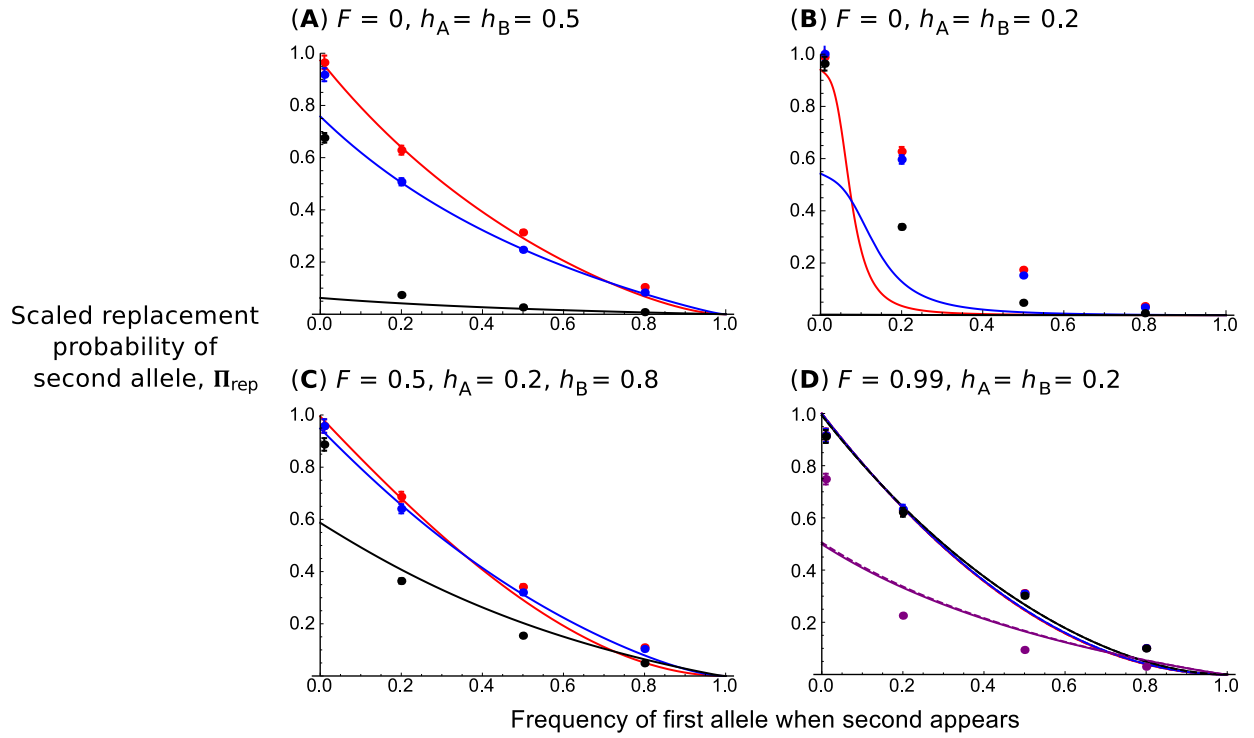

Figure 3: Probability  $\Pi_{rep}$  that a second beneficial allele with advantage  $s_B$  replaces an existing sweep with selective advantage  $s_A$ , where  $s_B > s_A$ , as a function of the first sweep frequency  $p$  when the second sweep appears.  $N = 5,000$  and  $2Nr = 0.01$  (red),  $0.1$  (blue),  $1$  (black), or  $100$  (purple; panel (d) only). In (d), dashed lines are analytical results using the more exact recombination rate,  $r(1-2F+\Phi)$ . Other parameters are indicated above each panel. Points corresponds to 5,000 stochastic simulations for which the second beneficial allele has fixed. If confidence intervals cannot be seen, they lie within the plotted points.

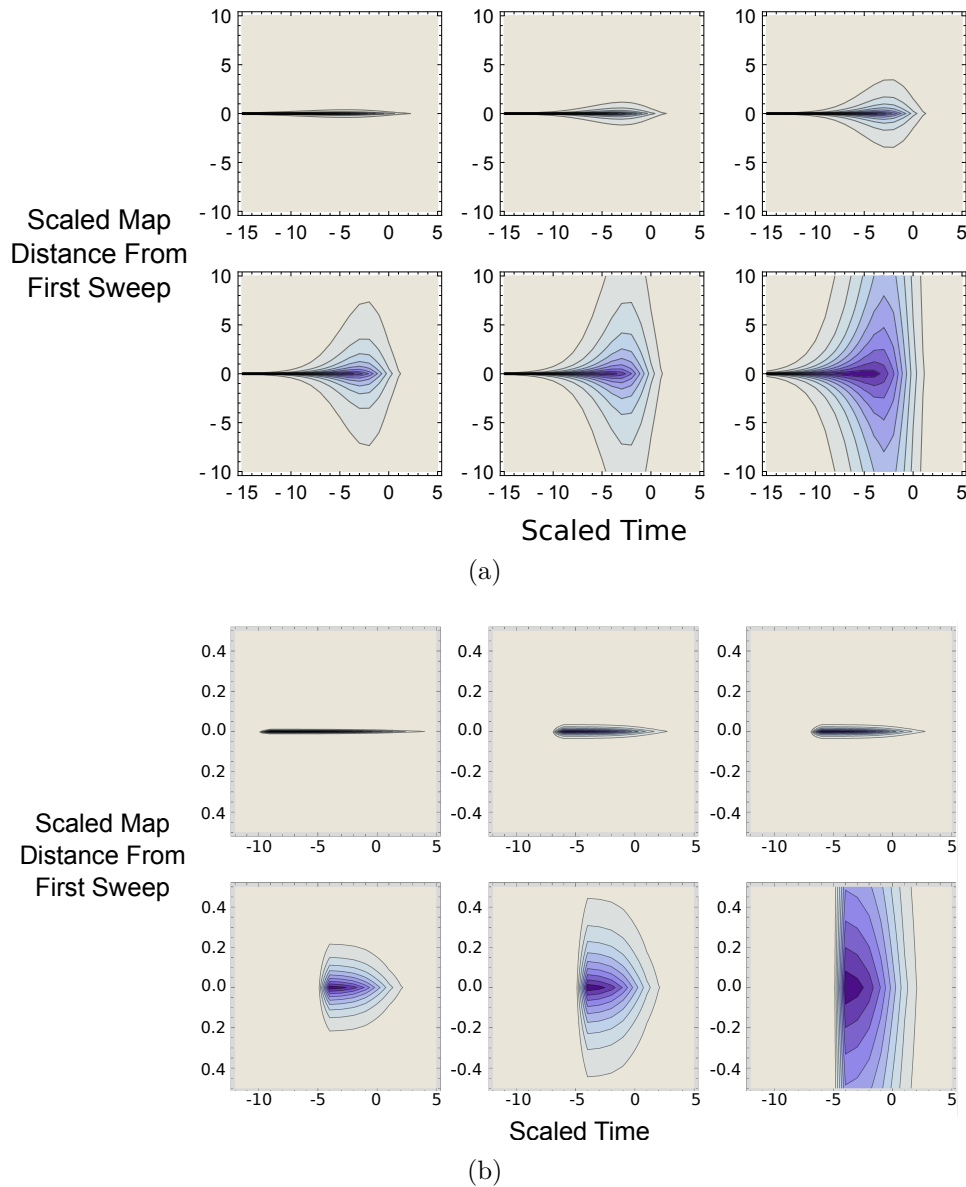

Figure 4: Contour plots showing degree of interference, as measured by Equation 2 with  $\Pi$  defined by Equation 22 (for  $\phi < 1$ ) and  $\Pi_{rep}$  defined with Equation 15 in Supplementary Material 1 (for  $\phi > 1$ ). Both beneficial mutations are additive ( $h_A = h_B = 1/2$ ). In both panels, darker colours indicate higher degree of interference (with the darkest representing  $R$  approaching 0). x-axis denotes time of the sweep (with the sweep reaching 50% frequency at  $T = 0$ ); y-axis is the map distance from the first sweep (scaled to  $10^{-2}/s_A$ ). Top row of plots are for  $F$  values of 0, 0.5, and 0.8 respectively; bottom row are  $F$  values of 0.9, 0.95, 0.99. Other parameters are  $N = 10,000$ , and (a)  $s_A = 0.01$ ,  $s_B = 0.005$  so  $\phi = 0.5$ ; or (b)  $s_A = 0.01$ ,  $s_B = 0.05$  so  $\phi = 5$ . Note difference y-axis scaling for (a) and (b).



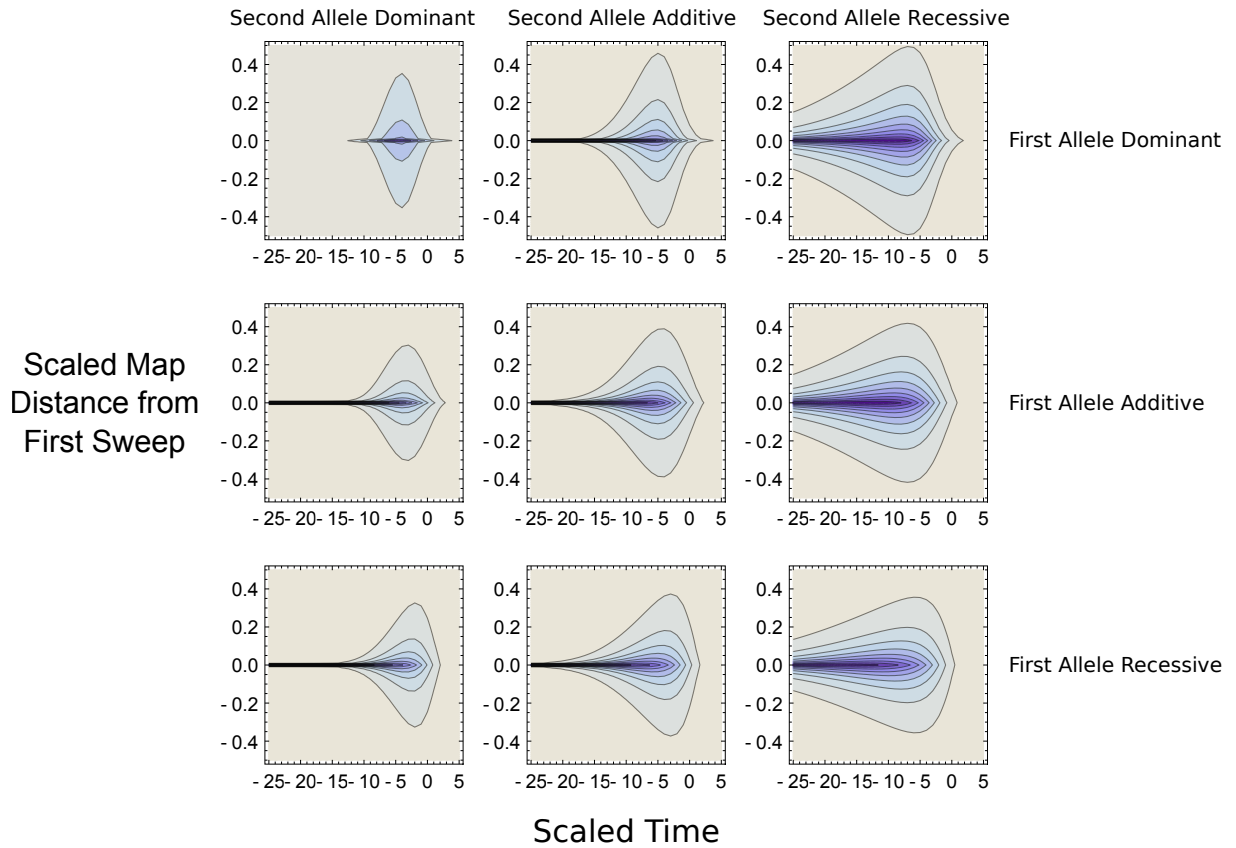

Figure 5: Contour plots showing degree of interference, as measured by Equation 2 with  $\Pi$  defined by Equation 22 and  $\Pi_{rep} = 0$  (as  $\phi < 1$ ), for different dominance values. In both panels, darker colours indicate higher degree of interference ( $R$  approaching 0); x-axis denotes time of the sweep (with the sweep reaching 50% frequency at  $T = 0$ ); y-axis is the map distance from the first sweep (scaled to  $10^{-2}/s_A$ ). Labels denote the dominance value of the first and second mutation, with recessive mutants having  $h = 0.2$ ; additive mutations  $h = 0.5$ ; dominant mutations  $h = 0.8$ . Other parameters are  $N = 10,000$ , and  $s_A = 0.01$ ,  $s_B = 0.005$  so  $\phi = 0.5$ .

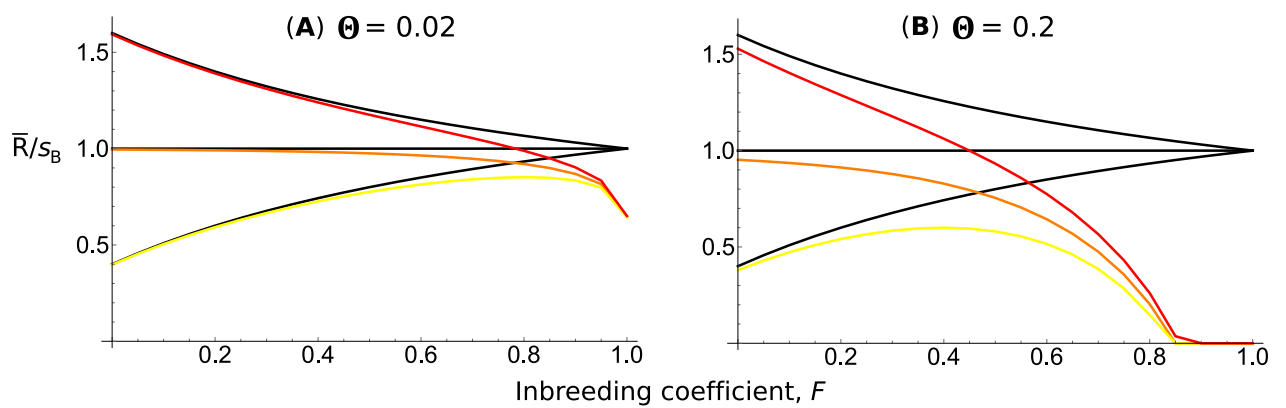

Figure 6: Plots of the total effect of interference,  $\bar{R}$ , as defined using Equation 16, as a function of  $F$ . The  $y$ -axis is the probability of emergence scaled to  $s_B$ , the expected emergence probability with  $F = 1$ . There is a continual rate of mutation  $\Theta = 4Nu_a = 0.02$  (left) or  $0.2$  (right).  $N = 10,000$ ,  $r = 0.01$ ,  $h_A = 0.5$ ,  $s_A = 0.01$ ,  $s_B = 0.001$  ( $\phi = 0.1$ ), and  $h_B = 0.2$  (yellow line),  $0.5$  (orange line), or  $0.8$  (red). Black lines show expected fixation probability in the absence of interference.

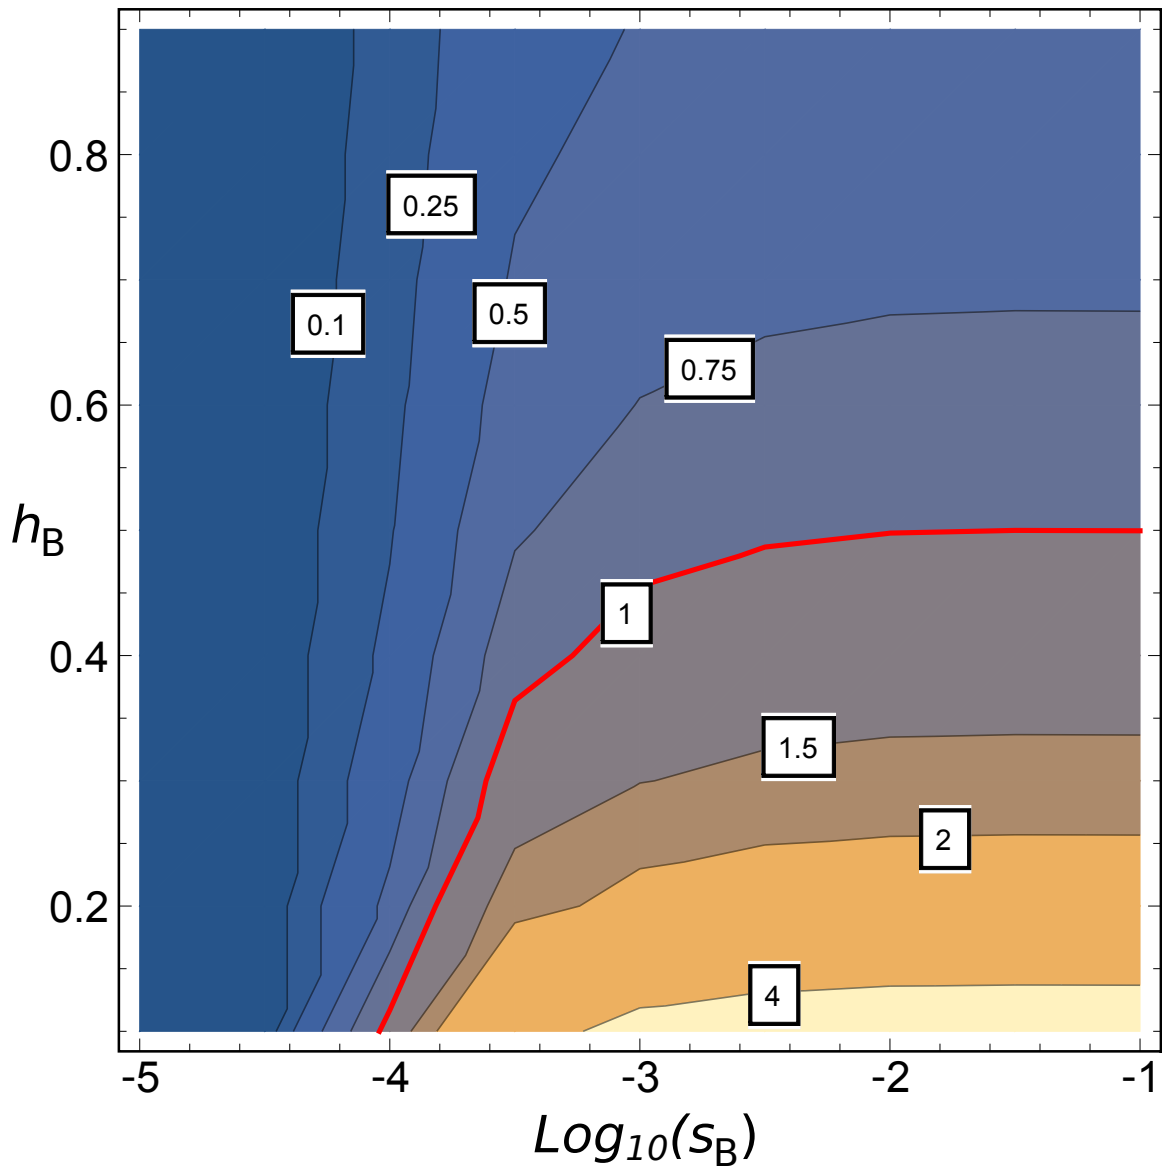

Figure 7: Contour plot of the ratio of  $\bar{R}$  (Equation 16) for  $F = 0$  and  $F = 0.95$ , as a function of  $s_B$  (on a  $\log_{10}$  scale) and  $h_B$ . Values less than one indicate that outcrossers has the higher fixation probability, and values greater than one indicate that  $F = 0.95$  populations have the higher probability. Other parameters are  $\Theta = 0.1$ ,  $N = 10,000$ ,  $r = 0.01$ ,  $h_A = 0.5$ , and  $s_A = 0.01$ .
